1 Ancient sedimentary DNA shows rapid post-glacial colonisation of Iceland followed by  
2 relatively stable vegetation until Landnám

3

4

5

6 Inger Greve Alsos, Youri Lammers, Sofia E. Kjellman, Marie Kristine Føreid Merkel, Emma

7 M. Bender, Alexandra Rouillard, Egill Erlendsson, Esther Ruth Guðmundsdóttir, Ívar Örn

8 Benediktsson, Wesley R. Farnsworth, Skafti Brynjólfsson, Guðrún Gísladóttir, Sigrún Dögg

9 Eddudóttir, Anders Schomacker

10

11 Corresponding author: Inger Greve Alsos, [inger.g.alsos@uit.no](mailto:inger.g.alsos@uit.no)

12

13 *Inger Greve Alsos, Tromsø University Museum, UiT The Arctic University of Norway, NO-9037 Tromsø,*

14 *Norway. <https://orcid.org/0000-0002-8610-1085>, [inger.g.alsos@uit.no](mailto:inger.g.alsos@uit.no)*

15

16 *Youri Lammers, Tromsø University Museum, UiT The Arctic University of Norway, NO-9037 Tromsø, Norway.*

17 *<https://orcid.org/0000-0003-0952-2668>, [youri.lammers@uit.no](mailto:youri.lammers@uit.no)*

18

19 *Sofia E. Kjellman, Department of Geosciences, UiT The Arctic University of Norway, P.O. Box 6050 Langnes,*

20 *NO-9037 Tromsø, Norway. <https://orcid.org/0000-0003-1165-8601>, [sofia.e.kjellman@uit.no](mailto:sofia.e.kjellman@uit.no)*

21

22 *Marie Kristine Føreid Merkel, Tromsø University Museum, UiT The Arctic University of Norway, NO-9037*

23 *Tromsø, Norway, [marie.f.merkel@uit.no](mailto:marie.f.merkel@uit.no).*

24

25 *Emma M. Bender, Department of Geosciences, UiT The Arctic University of Norway, P.O. Box 6050 Langnes,*

26 *NO-9037 Tromsø, Norway. [emma.bender@online.de](mailto:emma.bender@online.de)*

27

- 28 *Alexandra Rouillard, Department of Geosciences, UiT The Arctic University of Norway, P.O. Box 6050*  
29 *Langnes, NO-9037 Tromsø, Norway and Section for GeoGenetics, GLOBE Institute, University of Copenhagen,*  
30 *Øster Voldgade 5-7, DK-1350 Copenhagen K., Denmark. <https://orcid.org/0000-0001-5778-6620>,*  
31 *[alexandra.rouillard@uit.no](mailto:alexandra.rouillard@uit.no)*  
32  
33 *Egill Erlendsson, Institute of Life and Environmental Sciences, University of Iceland, Askja, Sturlugata 7, IS-102*  
34 *Reykjavík, Iceland. <https://orcid.org/0000-0002-2264-3504>, [egille@hi.is](mailto:egille@hi.is).*  
35  
36 *Esther Ruth Guðmundsdóttir, Department of Geosciences, UiT The Arctic University of Norway, P.O. Box 6050*  
37 *Langnes, N-9037 Tromsø and Institute of Earth Sciences, Nordic Volcanological Center, University of Iceland,*  
38 *Askja, Sturlugata 7, IS-102 Reykjavík, Iceland. <https://orcid.org/0000-0001-6987-3641>, [estherrg@hi.is](mailto:estherrg@hi.is)*  
39  
40 *Ívar Örn Benediktsson, Institute of Earth Sciences, University of Iceland, Askja, Sturlugata 7, IS-102 Reykjavík,*  
41 *Iceland. <https://orcid.org/0000-0002-9966-0767>, [ivarben@hi.is](mailto:ivarben@hi.is)*  
42  
43 *Wesley R. Farnsworth, NordVulk, Nordic Volcanological Center, University of Iceland, Askja, Sturlugata 7, IS-*  
44 *102 Reykjavík, Iceland. <https://orcid.org/0000-0001-7375-2228>, [wesleyf@hi.is](mailto:wesleyf@hi.is)*  
45  
46 *Skafti Brynjólfsson, Icelandic Institute of Natural History, Borgum við Norðurslóð, IS-600 Akureyri, Iceland.*  
47 *<https://orcid.org/0000-0002-2792-1964>, [skafti@ni.is](mailto:skafti@ni.is)*  
48  
49 *Guðrún Gísladóttir, Institute of Life and Environmental Sciences and Institute of Earth Sciences, University of*  
50 *Iceland, Askja, Sturlugata 7, IS-102 Reykjavík, Iceland. <https://orcid.org/0000-0002-4309-2414>, [ggisla@hi.is](mailto:ggisla@hi.is)*  
51  
52 *Sigrún Dögg Eddudóttir, University of Uppsala, Department of Archaeology and Ancient History, Engelska*  
53 *parken, Thunbergsvägen 3H, Box 626, 751 26 Uppsala, Sweden. <https://orcid.org/0000-0002-8632-8191>,*  
54 *[sigrun.dogg.eddudottir@arkeologi.uu.se](mailto:sigrun.dogg.eddudottir@arkeologi.uu.se)*  
55  
56 *Anders Schomacker, Department of Geosciences, UiT The Arctic University of Norway, P.O. Box 6050 Langnes,*  
57 *NO-9037 Tromsø, Norway. <https://orcid.org/0000-0002-8031-9008>, [anders.schomacker@uit.no](mailto:anders.schomacker@uit.no)*

58 **Abstract**

59 Understanding patterns of colonisation is important for explaining both the distribution of  
60 single species and anticipating how ecosystems may respond to global warming. Insular flora  
61 may be especially vulnerable because oceans represent severe dispersal barriers. Here we  
62 analyse two lake sediment cores from Iceland for ancient sedimentary DNA to infer patterns  
63 of colonisation and Holocene vegetation development. Our cores from lakes Torfdalsvatn and  
64 Nykurvatn span the last *c.* 12,000 cal. yr BP and *c.* 8600 cal. yr BP, respectively. With near-  
65 centennial resolution, we identified a total of 191 plant taxa, with 152 taxa identified in the  
66 sedimentary record of Torfdalsvatn and 172 plant taxa in the sedimentary record of  
67 Nykurvatn. The terrestrial vegetation at Torfdalsvatn was first dominated by bryophytes,  
68 arctic herbs such as *Saxifraga* spp. and grasses. Around 10,100 cal. yr BP, a massive  
69 immigration of new taxa was observed, and shrubs and dwarf shrubs became common  
70 whereas aquatic macrophytes became dominant. At Nykurvatn, all dominant taxa occurred  
71 already in the earliest samples; shrubs and dwarf shrubs were more abundant at this site than  
72 at Torfdalsvatn. There was an overall steep increase both in the local and regional species  
73 pool until 8000 cal. yr BP, by which time  $\frac{3}{4}$  of all taxa identified had arrived. In the period  
74 4500-1000 cal. yr BP, a few new taxa of bryophytes, graminoids and forbs are identified. The  
75 last millennium, after human settlement of the island (Landnám), is characterised by a sudden  
76 disappearance of *Juniperus communis*, but also reappearance of some high arctic forbs and  
77 dwarf shrubs. Notable immigration during the Holocene coincides with periods of dense sea-  
78 ice cover, and we hypothesise that this may have acted as a dispersal vector. Thus, although  
79 ongoing climate change might provide a suitable habitat in Iceland for a large range of species  
80 only found in the neighbouring regions today, the reduction of sea ice may in fact limit the  
81 natural colonisation of new plant species.

82

## 83 Keywords

84 ancient DNA, colonisation, Holocene, island, lake sediments, metabarcoding, vegetation

85 history

86

87

88

## 89 1. Introduction

90 Island biota are particularly vulnerable to climate change due to dispersal limitations (Harter  
91 et al., 2015; Weigelt et al., 2016). Because of arctic amplification, the earliest and most severe  
92 impact of climate change is expected at high latitudes (Bjorkman et al., 2018; CAFF, 2013).

93 Subsequently, the fate of the flora in this region will depend on the species' ability to track  
94 this change. While the arctic flora is assumed to have frequent long-distance dispersal (Alsos  
95 et al., 2015, 2007), oceans represent the greatest dispersal barriers (Eidesen et al., 2013).

96 Studies of contemporary vegetation as well as modelling simulations suggest a legacy of  
97 glaciation on patterns of taxonomic richness (Stewart et al., 2016; Svenning et al., 2015),  
98 whereas pollen records indicate either Early Holocene species saturation (Giesecke et al.,  
99 2019, 2012) or dispersal lags (Felde et al., 2018). Studies of ancient DNA may shed new light

100 on this debate as it better detects taxa and provides a higher taxonomic resolution, thereby

101 providing a stronger method to track past species occurrence (Clarke et al., 2020; Liu et al.,

102 2020; Rijal et al., 2020). A recent study of ancient DNA in northern Fennoscandia suggests

103 severe dispersal lags (Rijal et al., 2020), challenging our view of a very mobile arctic flora.

104

105 Iceland is among the most isolated islands in the North Atlantic. Glacial geological evidence

106 and numerical modelling indicate that the last Icelandic Ice Sheet reached the shelf around

107 Iceland during the Last Glacial Maximum (LGM) (Norðdahl and Ingólfsson, 2015; Patton et

108 al., 2017). While the renowned symposium in Iceland in 1962 (Löve and Löve, 1963)  
109 concluded that the majority of the biota must have survived the LGM *in situ*, later studies  
110 focusing on patterns of endemism and phylogeographic concluded that most species  
111 immigrated postglacially (Alsos et al., 2015; Brochmann et al., 2003). Furthermore, the  
112 estimated rate of colonisation in Iceland (1:33-214 yrs) is far greater than the Azores  
113 (1:40,000 yrs) or Hawaii (1:20,000-250,000 yrs; Alsos et al., 2015; Schaefer, 2003; Sohmer  
114 and Gustafson, 1987). Thus, the current view is that long-distance dispersal has been frequent  
115 in the amphi-Atlantic region. However, studies of phylogeography do not allow any direct  
116 dating of events, and older surviving populations may be swamped by new immigrants.  
117  
118 Palaeoecological data may provide more direct evidence of species at a given time and space.  
119 There are palaeoecological studies from ~70 profiles from ~36 sites in Iceland, the majority of  
120 them are pollen studies of peat deposits, only covering portions of the Holocene (Geirsdóttir  
121 et al., 2020; Hallsdóttir and Caseldine, 2005). Based on a review of all these records, the first  
122 occurrence could be determined for only 52 of 430 vascular plant taxa (Alsos et al., 2016).  
123 The average arrival date was 11,050 cal. yr BP, with a range from 13,000-7000 cal. yr BP.  
124 This average arrival date coincides with a period characterised by a high concentration of sea  
125 ice from the different source regions. Further, a close link was found between sea ice and  
126 driftwood. Thus, we hypothesise that sea-ice rafting was likely an important dispersal  
127 mechanism. Sea ice may act as a bridge, which allowed the Arctic fox to migrate to Iceland,  
128 potentially carrying seeds in the fur or digestive system (Graae et al., 2004). Also, it provided  
129 a smooth surface which seeds could have been wind-carried over. Furthermore, it may act as a  
130 ferry, transporting debris, driftwood and potentially propagules attached to it (Johansen and  
131 Hytteborn, 2001; Panagiotakopulu, 2014; Savile, 1972). However, determining the first  
132 arrival date for more taxa is needed to test this hypothesis.

133

134 The oldest post-glacial palaeoecological record from Iceland is from Lake Torfdalsvatn on the  
135 Skagi peninsula. The rich pollen and macrofossil record shows a relatively diverse arctic  
136 vegetation from 13,000 cal. yr BP, with more than ten taxa surviving the Younger Dryas,  
137 indicating that these species would also be able to survive the LGM *in situ* (Rundgren, 1998,  
138 1995; Rundgren and Ingólfsson, 1999). From around 11,300 cal. yr BP, indicators of  
139 disturbed ground like *Oxyria/Rumex* and *Koenigia* are found together with *Betula*, as well as  
140 scattered records of *Salix* and *Empetrum* (Rundgren, 1998; Rundgren and Ingólfsson, 1999).  
141 A rapid Early Holocene warming led to exposure of land and development of soils 10,500-  
142 8500 cal. yr BP (Langdon et al., 2010). The Saksunarvatn tephra (10,200 cal. yr BP) marks  
143 the transition from the Preboreal to the Boreal period, and is suggested to have temporarily  
144 reduced the vegetation diversity and pollen concentrations (Rundgren, 1998). Burial by the  
145 tephra and subsequent aeolian processes are thought to have altered vegetation communities  
146 towards species more tolerant of sand burial (Eddudóttir et al., 2015). However, pollen  
147 records indicate a recovery towards pre-deposition vegetation communities within 100 years  
148 (Caseldine et al., 2006; Eddudóttir et al., 2015; Rundgren, 1998). An increase in pollen  
149 concentrations as well as a shift from grass dominance to *Salix* occurs during the early Boreal  
150 period. This is followed by a shift to dominance of *Juniperus communis* together with *Betula*  
151 *nana* and *Empetrum*, until birch woodland developed from 9400-6850 cal. yr BP (Eddudóttir  
152 et al., 2015; Hallsdóttir and Caseldine, 2005; Rundgren, 1998). During the Middle to Late  
153 Holocene, woodland became more patchy or open, while heath and mires expanded from  
154 around 7000 cal. yr BP (Eddudóttir et al., 2015; Hallsdóttir and Caseldine, 2005). The Norse  
155 settlement (Landnám) from around AD 870 was a rapid process, and by AD 930, most of the  
156 farmable land was claimed (Smith, 1995; Vésteinsson and McGovern, 2012). Landnám is  
157 characterised by a rapid decline in birch pollen, especially in the lowlands (Erlendsson, 2007;

158 Hallsdóttir, 1987; Hallsdóttir and Caseldine, 2005). This pattern is also found in the less  
159 studied highlands (Eddudóttir et al., 2020), although some northeastern sites show decrease in  
160 birch prior to Landnám (Roy et al., 2018). Following settlement, the vegetation changed due  
161 to introduced plant species, habitat diversification as a result of land-use (mainly grazing), soil  
162 erosion and increased landscape openness, and diminished competition from dominant species  
163 (mainly birch). Such environmental modifications have almost certainly led to altered local  
164 plant composition and landscape-scale distribution patterns of vegetation, and may explain  
165 increased palynological richness near farms following Landnám (Erlendsson, 2007; Möckel et  
166 al., 2017; Þórhallsdóttir, 1996).

167

168 Here we study sedimentary ancient DNA (*sedaDNA*) of two lakes to explore patterns of  
169 species arrival and vegetation development over the Holocene. We investigate the lowland  
170 Lake Torfdalsvatn, as it holds the oldest known lacustrine sedimentary record from Iceland  
171 (Axford et al., 2007; Björck et al., 1992; Rundgren, 1998, 1995; Rundgren and Ingólfsson,  
172 1999). Furthermore, sedimentary algal pigments, stable isotopes, and biogenic silica have  
173 been analysed from the lake record (Florian, 2016). Lake Nykurvatn is located in a higher  
174 elevation catchment and represents a less studied region of Iceland. Unlike Torfdalsvatn, the  
175 site likely deglaciated during the Early Holocene (Norðdahl and Ingólfsson, 2015; Patton et  
176 al., 2017). We focus on 1) the proportion and functional type of species present prior to the  
177 onset of Early Holocene warming, which could indicate glacial survival, 2) patterns of arrival  
178 for plants of different functional groups, and 3) any modification of the vegetation related to  
179 Landnám.

180

181

## 182 2.1. Torfdalsvatn, North Iceland

183 Torfdalsvatn (66.06°N, 20.38°W, 40 m a.s.l.) is located at the Skagi peninsula in North  
184 Iceland (Fig. 1). The northern part of Skagi is characterised by gently undulating terrain with  
185 thin sediment cover. From 1961-1990, the mean annual air temperature at Hraun located on  
186 Skagi was 2.5°C, and the mean annual precipitation was 475 mm. In July, the mean air  
187 temperature at Hraun was 8.2°C (Icelandic Meteorological Office, 2020a).

188  
189 Torfdalsvatn has an area of 0.4 km<sup>2</sup> (Fig. 2), a catchment of *c.* 3.7 km<sup>2</sup> (Rundgren, 1995) and  
190 a median slope of 1.1° (Florian, 2016). The water depth at the centre of the basin is *c.* 5.1 m  
191 (Rundgren and Ingólfsson, 1999) to 5.8 m (Florian, 2016). Dwarf-shrub heaths, herb and  
192 grass tundra, and *Carex*-dominated fens characterise the vegetation in the modern catchment  
193 (Rundgren, 1997). The most abundant dwarf-shrub species are *Empetrum nigrum* and *Salix*  
194 *herbacea*, and the shrub *Betula nana* is also common. (Björck et al., 1992) obtained an 11.95  
195 m long sediment sequence from Torfdalsvatn, and showed that the sedimentary record goes  
196 back to the Allerød, and that the site was ice free during the Younger Dryas. Palaeobotanical  
197 data indicate a sparse to discontinuous cover of graminoids, herbs, shrubs and dwarf shrubs  
198 during Allerød (Rundgren, 1997). During the Younger Dryas, the shrub and dwarf-shrub  
199 vegetation disappeared, and the plant cover was sparse. In the Preboreal, the graminoids,  
200 shrubs and dwarf shrubs reappeared.

201  
202 Torfdalsvatn is shared between the landholdings of the active farms Tjörn and Hafnir. The  
203 farms are both featured in a letter from AD 1285 regarding land boundaries of farms owned  
204 by the Þingeyrarklaustur monastery (DI, 1857-1986, pp. 249-250). In *Jarðabók*, a land  
205 registry from the beginning of the 18<sup>th</sup> century, the farms were still operating. Livestock  
206 consisted of cattle, sheep and horses. Both farms also had access to *rifhrís* (*Betula nana*) for



207 firewood (Magnússon and Vídalín, 1927, pp. 473-479). Throughout, the inhabitants of both  
208 farms have probably operated a standard pastoral farming.

209

210

## 211 2.2. Nykurvatn, Northeast Iceland

212 Nykurvatn (65.63°N, 15.14°W, 428 m a.s.l.) is situated at the Bustarfell plateau above the  
213 Hofsárdalur valley, located in the up to 20-km wide Vopnafjörður fjord-valley system in  
214 Northeast Iceland (Fig. 1). The minimum age of deglaciation of the highland plateaus above  
215 the Hofsárdalur valley is 9400 cal. yr BP (Sæmundsson, 1995). From 1995-2019, the mean  
216 annual air temperature and precipitation at Skjaldþingsstaðir (42 m a.s.l.) in the Hofsárdalur  
217 valley, 16 km northeast of Nykurvatn, are 3.8°C and 1215 mm, respectively. The July mean  
218 temperature was 10.0°C (Icelandic Meteorological Office, 2020b). Nykurvatn has an area of  
219 0.59 km<sup>2</sup> (Fig. 2), the catchment is *c.* 10 km<sup>2</sup>, and the water depth at the centre of the lake is *c.*  
220 10.0 m. The area around Nykurvatn is classified as moors and heathland (National Land  
221 Survey of Iceland, 2020).

222

223 Ownership of Nykurvatn is shared between three currently occupied farmlands, Hauksstaðir,  
224 Teigur and Bustarfell. Place names and house ruins indicate a greater density of farms and  
225 cottages in the past. The adjacent farm Hof is listed in *Landnámabók* (Book of Settlements)  
226 among the earliest settled farms (Benediktsson, 1968, p. 290) and Hauksstaðir (Haugstaðir)  
227 and Bustarfell enter the historical records no later than in the 14th century AD. Place names  
228 and historical sources also attest to the existence of woodlands in the past (DI IV, p. 217).  
229 Given the high altitude of Nykurvatn, summer grazing of livestock probably took place by the  
230 lake.

231

232

### 233 3. Methods

#### 234 3.1. Sediment coring and subsampling

235 Lake sediment cores were retrieved using a hand-held piston corer (150 and 200 cm long and  
236 75 and 60 mm diameter coring tubes for Torfdalsvatn and Nykurvatn, respectively) from the  
237 lake ice. Seven core sections were collected from Torfdalsvatn (TDV2-1 to TDV2-7; water  
238 depth 5.1 m) in 2012. TDV core sections were purposely collected without overlap. Four  
239 overlapping core sections (NYK1 to NYK4; water depth 10.0 m) were collected in the centre  
240 of Nykurvatn in 2018. Additionally, one core (NYK5; water depth 3.8 m) was sampled in the  
241 distal (NE) end of the lake where the sedimentation rate is lower. The aim of this was to  
242 obtain older sediments because coring deeper below NYK4 was not possible with the piston  
243 corer. Cores were preserved in the dark and cold ( $\sim 4^{\circ}\text{C}$ ) until opening.

244

245 Half-cores were sub-sampled for *seDa*DNA immediately upon opening, wearing full  
246 bodysuits, masks and sterile gloves in dedicated clean-lab facilities with no-PCR products.  
247 The TDV cores were sampled using 5 mL sterile disposable syringes as described by  
248 Voldstad et al. (2020) whereas the NYK core was sampled using clean disposable plastic  
249 knives and spatulas as described in Rijal et al. (2020). All samples were stored at  $4^{\circ}\text{C}$  until  
250 DNA extractions.

251

#### 252 3.2 Geochemical analyses

253 The TDV cores were logged and analysed in the sediment lab and ITRAX core facility at the  
254 University of Copenhagen (Centre for GeoGenetics) and the NYK cores at UiT The Arctic  
255 University of Norway (Department of Geosciences). ITRAX and Avaatech core scanners  
256 were used to collect high-resolution data (X-ray fluorescence, (XRF), magnetic susceptibility

257 (MS), and optical and radiographic images) from split core sections from TDV and NYK,  
258 respectively. XRF measurements were conducted every 1 mm at 30 kV and 30  $\mu$ A with a 30 s  
259 exposure for the ITRAX scanner and every 2 mm at 10 kV and 30  $\mu$ A with a 20 s exposure  
260 time for the Avaatech scanner. Both core scanners have an X-ray source with a Rh (rhodium)  
261 anode (Croudace et al., 2006; Forwick, 2013). For the ITRAX measurements, Ti was  
262 normalised against the incoherent (inc) and coherent (coh) Rh scatter (Ti/(inc+coh)) to  
263 remove instrumental effects (Kylander et al., 2011). The Ti signal from the Avaatech scanner  
264 was normalised against the sum of Al, Si, S, K, Ca, Ti, Mn and Fe (Ti/Sum) to minimise  
265 artefacts (Weltje and Tjallingii, 2008). The Ti signal of the NYK core sections is presented to  
266 identify the overlap between core sections (Supplementary Fig. S1). Loss on ignition (LOI;  
267 Heiri et al., 2001) was measured to determine the total organic content for the NYK core.  
268 Samples (2 cm<sup>3</sup>) were collected every 5 cm, with additional samples at visible transitions in  
269 the lithology. The samples were dried at 110°C for 2 h and ignited at 550°C for 4 h.

270

### 271 3.3 Age-depth modeling and core correlation

272 The chronologies of both lake cores were constructed based on accelerator mass spectrometry  
273 (AMS) <sup>14</sup>C measurements on plant macrofossils and identified tephra markers. The <sup>14</sup>C  
274 samples were analysed at the Ångström Laboratory, Uppsala University, Sweden. For  
275 calibrating the <sup>14</sup>C ages, the online OxCal software (v.4.4, Bronk Ramsey, 2009) and the  
276 IntCal20 dataset (Reimer et al., 2020) were used. All calibrated radiocarbon ages are  
277 presented as calibrated year before present (cal. yr BP; BP = 1950). Visually identified tephra  
278 layers were sampled and analysed for major element composition at the Institute of Earth  
279 Science, University of Iceland, using Electron Probe Microanalysis (EPMA). A JEOL JXA-  
280 8230 Super probe with an acceleration voltage of 15 kV, a beam current of 10 nA and a beam  
281 diameter of 10  $\mu$ m was used for the EPMA. Natural and synthetic minerals were used for

282 standardisation as well as basaltic (A99) and rhyolitic glass (Lipari Obsidian; ATHO). On  
283 each polished thin section, 20-30 point analyses were performed on randomly selected lines.  
284 The dataset was examined for outliers and contamination by microlites. All analyses with  
285 sums lower than 95% were discarded. Tephra layers were identified based on their chemical  
286 composition.

287  
288 The NYK1-NYK4 core sections were stratigraphically correlated based on identified tephra  
289 marker layers,  $^{14}\text{C}$  ages, trends in the XRF data and visual similarities in lithology. Tie points  
290 were used to align the cores in AnalySeries (v. 2.0.4.2, Paillard et al., 1996) and construct a  
291 common stratigraphic depth-scale (Supplementary Fig. S1). The alignment was primarily  
292 based on the Ti/Sum ratio. We assume neither overlap nor hiatus between NYK4 and NYK5.  
293 As previously described, the TDV core sections were sampled without overlap, in a  
294 continuous sequence, and therefore do not need to be correlated.

295  
296 For establishing the chronologies of the composite cores, the Bacon package (v. 2.5.0, Blaauw  
297 and Christen, 2013) with the IntCal20 dataset (Reimer et al., 2020) were used in R (v. 4.0.3,  
298 Core, 2015). The age-depth models were constructed using a mean accumulation rate  
299 (acc.mean) of 20 yr/mm for both cores and upper (d.min) and lower (d.max) depths set to the  
300 upper- and lowermost depths of the cores. For >5 cm thick tephra layers (Saksunarvatn in  
301 TDV and V1477 in NYK), a slump was added to reflect the increased sedimentation rate at  
302 deposition.

303

### 304 3.6 DNA extraction and amplification

305 DNA analyses were performed in the ancient DNA laboratory at the Arctic University  
306 Museum, Tromsø. Initially, 8-10 g of sediments were homogenised. DNA was extracted from

307 subsamples of ~0.3 g using PowerSoil Power Lyser kit and incorporating a bead beating step  
308 as in Alsos et al. (2020). We included negative controls during sampling from the core,  
309 extraction, and PCR setup, as well as positive controls during PCR. In total, 146 samples, 14  
310 sampling and extraction negative controls, 4 PCR negative and 4 PCR positive controls were  
311 analysed.

312  
313 We amplified the short and variable P6 loop region of the chloroplast trnL (UAA) intron  
314 (Taberlet et al., 2007), following the same analysis protocol Alsos et al. (2020), and running 8  
315 PCR replicates on each DNA extract using unique 8 or 9 bp long tags added to the 5' end of  
316 each primer. We pooled the PCR replicates, and thereafter cleaned and quantified them using  
317 Qubit (Invitrogen™ Quant-iT™ and Qubit™ dsDNA HS Assay Kit, Thermofisher). We  
318 converted the pools into DNA libraries using a Truseq DNA PCR-free low-throughout library  
319 prep kit (Illumina). The library was quantified by qPCR using the KAPA Library  
320 Quantification Kit for Illumina sequencing platforms (Roche) and a Quantstudio 3 (Life  
321 Technologies). The library was normalised to a working concentration of 10 nM using the  
322 molarity calculated from qPCR adjusted for fragment size. Sequencing was conducted on an  
323 Illumina NextSeq 500 platform (2x150 bp, mid-output mode, dual indexing) at the Genomics  
324 Support Centre Tromsø (UiT).

325

326

### 327 3.7 DNA sequencing analyses and filtering

328 We aligned, filtered and trimmed the next-generation sequencing data using the OBITools  
329 software package (Boyer et al., 2016) and a custom R-script (available at  
330 <https://github.com/Y-Lammers/MergeAndFilter>). The new reference library PhyloNorway,  
331 consisting of 2051 specimens of 1899 vascular plant taxa from Norway and the Polar Regions

332 was used (Alsos et al., 2020). Additionally, we used the circumarctic/circumboreal  
333 ArcBorBryo library, containing 2445 sequences of 815 arctic and 835 boreal vascular plants  
334 as well as 455 bryophytes (Soininen et al., 2015; Sønstebø et al., 2010; Willerslev et al.,  
335 2014). Our third reference library was obtained by running the *ecotag* program on the EMBL  
336 (r1143) nucleotide reference database. We only retained sequences with 100% match to one of  
337 the reference libraries and a minimum of 3 replicates across the dataset. As 94% of the taxa in  
338 Iceland also are found in Norway (Alsos et al., 2015), match to PhyloNorway was given  
339 priority for vascular plants, whereas match to ArcBorBryo was given priority for bryophytes.  
340 For sequences assigned to several taxa, the most likely taxa with 100% match were listed  
341 based on known presence in the native flora.

342  
343 We manually cross-checked that identifications were consistent among the reference libraries  
344 used, and inconsistent taxonomic assignments were cross-checked using NCBI BLAST. As  
345 this process is time-consuming, we only checked sequences that occurred with a minimum 10  
346 replicates if they had 100% match to one of the regional reference libraries (PhyloNorway or  
347 ArcBorBryo). We followed the taxonomy of Wąsowicz (2020). Furthermore, the quality of  
348 each sample was assessed following the method described by Rijal et al. (2020).

349

350

### 351 3.8 Data analyses

352 Initial diagrams were plotted in R version 4.0.3 using the *rioja* (v0.9.26) and *ggplot2* (v3.3.2)  
353 packages. We explored zonation for DNA using constrained incremental sum of squares  
354 (CONISS) as implemented in *rioja*. Final diagrams were constructed using *Tilia* v.2.6.1  
355 (<https://www.tiliait.com/>).

356

357

## 358 4. Results

359

### 360 4.1 Chronology and core correlation

361 All radiocarbon ages, calibrated median ages and  $2\sigma$  age intervals are presented in Table 1,  
362 and the tephra marker layers in Table 2. The identified tephra layers have been correlated to  
363 source volcanic system and particular volcanic event using geochemistry, stratigraphic  
364 position and age. Geochemical correlation of Hekla 1104, Hekla 3, Hekla 4 and Saksunarvatn  
365 ash in TDV and V1477, Hekla 3 and Hekla 4 in NYK are shown on elemental bi-plots in  
366 Supplementary Fig. S2. The complete geochemical dataset and standard runs are presented in  
367 Supplementary Table S1. Given the geochemical similarity of the Saksunarvatn/G10ka series  
368 tephra (Óladóttir et al., 2020) and the relatively short phase of associated volcanism compared  
369 to the Holocene scale of this study, we refer to the tephra horizon as a marker layer according  
370 to the Greenland ice core chronology (Rasmussen et al., 2006). Radiocarbon age Ua-65341  
371 from NYK (Table 1) is an outlier when compared to Ua-67058 and tephra marker layers  
372 V1477 and Hekla 3 stratigraphically below, and was excluded when running the final age-  
373 depth model for NYK (Fig. 3B).

374

375 The TDV sections were sampled without an overlap, and stacked on top of each other to  
376 establish the composite record. The age-depth model supports this approach. The 915 cm long  
377 TDV record spans the last *c.* 12,000 years (Fig. 3A). The correlation of the NYK core sections  
378 showed large overlaps between NYK1, NYK2 and the upper half of NYK3 (Supplementary  
379 Fig. S1). Also, part of NYK3 and NYK4 were overlapping, whereas there was no overlap  
380 between NYK4 and NYK5. Presuming no hiatus between NYK4 and NYK5 resulted in a  
381 fairly linear age-depth model for that part of the record, and we therefore consider it a

382 reasonable assumption. The 464 cm long composite NYK record spans the last *c.* 8600 years  
383 (Fig. 3B).

384

385

## 386 4.2 Lithology and stratigraphy

387 Four main sedimentary facies were identified in Torfdalsvatn: clay, clayey gyttja, laminated  
388 gyttja, and tephra (Fig. 4A; Supplementary Figs S3-S9). The clay facies is grey and  
389 homogeneous, and the MS and Ti/(inc+coh) are high. We interpret this facies as clay formed  
390 from suspension settling of particles originating from sediment-laden streams flowing into the  
391 basin. The clayey gyttja is brown-grey and the MS and Ti/(inc+coh) records indicate a lower  
392 minerogenic content than in the clay. We interpret this facies as formed by organic  
393 sedimentation and inflow of minerogenic material by runoff from the catchment (e.g., (Björck  
394 et al., 1992; Rundgren, 1995)). The laminated gyttja facies is light olive-brown and contains  
395 numerous silt-sand sized tephra beds. The magnetic susceptibility (MS) and the Ti/(inc+coh)  
396 are very low, indicating less inflow of minerogenic material compared to the clayey gyttja.  
397 The tephra facies appear as 1-180 mm thick, black or white beds of silt-sand size volcanic  
398 glass. Angular tephra grains and characteristic chemical composition suggest that they are not  
399 reworked. Therefore, we interpret the tephra as originating from airborne material during  
400 volcanic eruptions (e.g., Gudmundsdóttir et al., 2012; Larsen and Eiríksson, 2008; Lowe,  
401 2011).

402

403 Three main sedimentary facies were identified in Nykurvatn (Fig. 4B; Supplementary Figs  
404 S10-S14). The laminated gyttja facies is light olive-brown, containing silt-sand sized tephra  
405 beds. It has an organic content of 1-11%, with the lowest values in the tephra and highest  
406 values in the massive parts of the gyttja. As in Torfdalsvatn, we interpret the gyttja facies as



407 formed by organic sedimentation and inflow of minerogenic material by runoff. The tephra  
408 facies are 1-180 mm thick, black or white beds of silt-sand size. Again, we interpret it as  
409 originating from airborne material from volcanic eruptions (Gudmundsdóttir et al., 2012;  
410 Larsen and Eiríksson, 2008; Lowe, 2011). The grey-brown silt-sand facies appear as 3-5 cm  
411 thick beds and only occur in NYK5. We interpret this facies as deposited from higher input of  
412 minerogenic material to the basin e.g., by runoff and/or aeolian activity.

413

414

#### 415 4.3 *sedaDNA* data

416 In total, 25,662,641 merged paired-end reads were obtained for both lakes. Out of these,  
417 16,383,211 reads, belonging to 324 sequences were retained after filtering, where 147  
418 sequences were identified with PhyloNorway, 191 with ArctBorBryo and 308 with EMBL  
419 (Supplementary Tables S2-3). Among sequences with less than 10 repeats across all samples,  
420 we discarded 64 that had <100% match to the local reference libraries. We assume these  
421 mainly represent homopolymer variants of more common sequences, PCR and sequencing  
422 artefacts, but it also excluded some taxa that were rare in our dataset (e.g., *Anthyrium*). The  
423 remaining 260 sequences were manually cross-checked for consistency. Sequences that were  
424 assigned to the same taxon and co-occurring in samples, were merged. Also, 402,835 reads of  
425 40 sequences of known food contaminants or those that were biogeographically unlikely were  
426 omitted. We removed four samples from Torfdalsvatn (two of them from the Saksunarvatn  
427 tephra layer) and two samples from Nykurvatn due to low quality scores (Supplementary  
428 Table S4). This resulted in a final data set of 15,966,705 reads of 191 taxa (146 vascular  
429 plants and 45 bryophytes).

430

431

#### 432 4.4 Vegetation at Torfdalsvatn

433 At Torfdalsvatn, we identified 60 taxa of forbs, 31 bryophytes, 23 graminoids, 11 woody, 16  
434 aquatic macrophytes, 4 ferns, 3 horsetails, 1 club moss and 3 taxa of algae, in total 152 taxa  
435 (Fig. 5, Supplementary Table S4). The CONISS analyses identified 5 zones (TDV-DNA1 to  
436 TDV-DNA5) with breakpoints at approximate 10,100 cal. yr BP, 6700 cal. yr BP, 2400 cal. yr  
437 BP and 950 cal. yr BP.

438  
439 The oldest CONISS zone (TDV-DNA1, 11,600-10,100 cal. yr BP) included the grey clay, the  
440 brown-grey clay, and the start of the light brown-olive gyttja (Fig. 4A). The grey clay was  
441 characterised by high arctic forbs (such as *Saxifraga* spp., *Ranunculus*, *Draba*), grasses (most  
442 likely dominated by *Phippisa algida*, but also *Trisetum* and *Alopecurus*) and diverse  
443 bryophytes (19 taxa, Fig. 5), with the bryophytes being most abundant (Fig. 6). During this  
444 period, the highest proportion of unidentified reads occurs, potentially representing algae  
445 which are generally poorly represented in reference libraries. This is also the period with the  
446 highest abundance of graminoids in this record, which constitutes up to 34% of the terrestrial  
447 plant reads (Fig. 6C, Supplementary data S5). Note however that graminoids may be  
448 underestimated with our DNA protocol (Alsos et al., 2018). The diversity increased in the  
449 brown-grey clay (from *c.* 10,850 cal. yr BP) with more high arctic forbs like *Oxyria digyna*,  
450 *Koenigia islandica*, *Cerastium*, *Micranthes* and *Cardamine polemooides*, the first appearance  
451 of sedge (*Carex maritima*) and seven more bryophytes (Fig. 5). After that, the forbs, mainly  
452 *Saxifraga* spp., almost completely replaced the bryophytes for a short period (Fig. 6). Only  
453 after the transition to the light brown-olive gyttja (*c.* 10,400 cal. yr BP), the first woody  
454 species appear with the dwarf shrub *Empetrum nigrum* and the willow *Salix*, which most  
455 likely represent *Salix arctica* or *S. herbacea*. At the same time, 15 new forbs, eight new  
456 graminoids (including rushes such as *Luzula* spp.) and three new bryophytes appear. In

457 addition, the first aquatic macrophyte (*Myriophyllum alterniflorum*), fern (*Cystopteris*  
458 *fragilis*), algae (*Nannochloropsis gaditana*), and horsetails (*Equisetum* spp.) appear (Fig. 5).  
459  
460 No further change in lithology occurs in the other CONISS zones. Zone TDV-DNA2 (10,100-  
461 6700 cal. yr BP) was characterised by a massive immigration of species, with the arrival of  
462 *Betula* (either *B. nana* or *B. pubescens*), *Sorbus aucuparia*, *Juniperus communis* and the  
463 dwarf shrubs *Kalmia procumbens*, *Vaccinium uliginosum*, *V. myrtillus*, *Thymus praecox* and  
464 *Dryas octopetala* (Fig. 5). In total, 23 new taxa of forbs arrived, the majority of them  
465 appearing in most samples onwards, for example *Galium*, Asteraceae, *Alchemilla*, *Rumex* and  
466 *Plantago*, but also some rare forbs such as Orchidaceae. Also, a few new graminoids, ferns,  
467 algae, horsetails and one club moss arrive (Fig. 5). This zone is when most aquatic  
468 macrophytes arrive, making up >50% of the reads in most samples for the rest of the lake  
469 record (Fig. 6A). In addition to the massive immigration, this zone is characterised by the  
470 disappearance of many of the early high arctic forbs, *Phippisia*, and bryophytes.  
471  
472 The transition to zone TDV-DNA3 (6700-2400 cal. yr BP) is characterised by arrivals of a  
473 few new species. Rowan (*Sorbus aucuparia*) appears in almost every sample in the first two  
474 thirds of the zone but then it disappears c. 4000 cal. yr BP. The change is most clear in the  
475 aquatics, with the aquatic macrophyte *Littorella uniflora* and the algae *Cosmarium botrytis*  
476 appearing. Also, a few members of the rose family (*Potentilla anserina*, *Rubus/Fragaria*)  
477 appear. There is a sudden peak in the proportion of trees and shrubs at 4300 cal. yr BP (Fig.  
478 6C), mainly caused by 40% *Juniperus communis* in a single sample (Supplementary Table  
479 S5); this may be due to occurrence of macrofossils in that sample rather than a change in the  
480 vegetation. There is no disappearance of taxa, but the fern *Gymnocarpium dryopteris* becomes  
481 less common.

482  
483 TDV-DNA4 (2400-950 cal. yr BP) is poorly distinguished from the previous zone and mainly  
484 represents a change in abundance of some taxa, such as an increase in *Juniperus communis*,  
485 *Vaccinium myrtillus*, *Thymus praecox*, *Dryas octopetala*, *Festuca richardsonii*, *Juncus*  
486 *trifidus*, and *Thalictrum alpinum* (Supplementary Table S5). Only scattered records of one  
487 new aquatic macrophyte (*Hippuris vulgaris*), two graminoids, one bryophyte and one forb are  
488 observed (Fig. 5). However, some of the early high arctic taxa, such as *Silene acaulis* and  
489 *Oxyria digyna*, reappear. A reduction in a few taxa, such as *Equisetum variegatum* and  
490 *Lycopodium*, is also observed.

491  
492 The uppermost zone, TDV-DNA5, starts at ~950 cal. yr BP (AD 1000, taken as midpoint  
493 between sample TDV.79 at median age 1055 cal. yr BP and TDV.80 at 846 cal. yr BP).  
494 According to the CONISS analyses, the change at 950 cal. yr BP represents the most  
495 pronounced change since the onset of the Holocene warming around 10,100 cal. yr BP (Fig.  
496 5). Notably, *Juniperus communis* suddenly disappears after being found in almost every  
497 sample from 10,000 cal yr BP to 1055 cal. yr BP (AD 895). A whole range of forbs  
498 disappears or reduces in abundance after being common for nearly 9000 years: *Ranunculus*  
499 *confervoides*, *R. reptans*, *Angelica archangelica*, *A. sylvestris*, *Rhodiola rosea*, *Galium*,  
500 *Rhinanthus minor* and *Geum rivale*. In contrast, two of the high arctic forbs, *Koenigia*  
501 *islandica* and *Oxyria digyna*, become common again, together with arrivals of some new  
502 arctic-alpine forbs, e.g., *Saxifraga oppositifolia*, *Antennaria alpina*, and *Scorzoneroidea*  
503 *autumnalis*. *Plantago maritima* increases in abundance. Notably, a sequence identified as  
504 potential archaeophyte (*Phleum pratense* and/or *Alopecurus pratensis*) appears. Three aquatic  
505 macrophytes, *Caltha palustris*, *Callitriche hermaphroditica* and *Potamogeton berchtoldii*,

506 disappear, indicating a shift in the lake water conditions. The proportion of trees and shrubs  
507 increases towards the end of this zone, mainly due to an increase in *Salix* (Figs 5-6).

508

509

#### 510 4.5 Vegetation at Nykurvatn

511 We identified 66 taxa of forbs, 38 bryophytes, 27 graminoids, 15 aquatic macrophytes, 14  
512 woody, 5 ferns, 3 horsetails, 1 club moss and 3 taxa of algae, in total 172 taxa (Fig. 7,  
513 Supplementary Table S4). CONISS analyses did not identify any significant zonation in the  
514 DNA data. This is in accordance with the uniform lithology (Fig. 4B). All the dominant taxa  
515 occurred already in the oldest few samples. Notably, the record starts at 8600 cal. yr BP,  
516 which is ~1500 years after the massive immigration observed at Torfdalsvatn. *Salix* was  
517 found in all samples, and *Betula* in all except two, both of which had generally low DNA  
518 quality scores. The non-native tall shrub/tree *Alnus* appeared in two samples (5200 and 200  
519 cal. yr BP), whereas the native *Sobus aucuparia* only was found in one sample from 1200 cal.  
520 yr BP. *Juniperus communis* was common until 7000 cal. yr BP, after which it only had  
521 scattered occurrences, and it was not found in samples from the last 1000 years. Also, some  
522 arctic-alpines were most abundant in the early part and then again in the last 1000 years (e.g.,  
523 *Euphrasia*, *Galium*, *Silene acaulis*, *Oxyria digyna*, *Antennaria alpina* and *Pedicularis*  
524 *flammea*). There is a change in aquatic macrophytes, with the more nutrient demanding  
525 species *Potamogeton berchtoldii* and *Caltha palustris* only being common from 7600-3300  
526 cal. yr BP. In contrast to Torfdalsvatn, bryophytes were common throughout the core. One  
527 taxa classified as naturalised non-native taxon (Wąsowicz, 2020), *Lamium album* (four  
528 records 8100-2300 cal. yr BP), was also observed.

529

530

#### 531 4.6 Richness and accumulation of species pool

532 The earliest recorded arrival date of each species is given in Supplementary Table S6. At both  
533 sites, there is a rapid increase of species in the early part of the cores. At Torfdalsvatn, there is  
534 a steep increase in species richness of bryophytes prior to the increase in forbs, whereas the  
535 opposite is observed for Nykurvatn (Fig. 8). At both sites, the richness of trees and shrubs,  
536 dwarf shrubs, vascular cryptogams, and aquatic macrophytes levelled off after the first wave  
537 of colonisation. The number of forb taxa continued to increase at both sites. The apparent  
538 levelling off during some shorter periods at Nykurvatn (e.g., ~6000, ~4000, 2500 and 1500  
539 cal. yr BP) may represent sampling artefacts as it coincides with periods with less dense  
540 sampling interval (Fig. 7). In contrast, the levelling off at 5900-700 cal. yr BP at Torfdalsvatn  
541 is in a period with dense sampling (Fig. 5), so this is assumed to represent a real pattern. Note  
542 that the number of forbs increases again at Torfdalsvatn from around 600 cal. yr BP (1350  
543 AD). The number of bryophytes levels off at 10,300 cal. yr BP at Torfdalsvatn, with only four  
544 additional bryophyte taxa thereafter. At Nykurvatn, the number of bryophytes continues to  
545 increase with a pronounced increase from 1200 cal. yr BP (750 AD). On the contrary, the  
546 number of graminoids levels off at 3800 cal. yr BP at Nykurvatn, whereas at Torfdalsvatn  
547 graminoids increases up to 8800 cal. yr BP and then again from 5000 cal. yr BP.

548  
549 When data from both sites as well as the review study are aggregated, only 1-2 new taxa of  
550 vascular cryptogams, trees and shrubs, dwarf shrubs or aquatic macrophytes are observed  
551 after 8000 cal. yr BP (Fig. 8C). No new graminoids and only one new forb arrive after 4500  
552 cal. yr BP, whereas bryophytes increase in the last 1000 years.

553  
554 The average raw richness was 13.92 for Torfdalsvatn and 19.19 for Nykurvatn. The richness  
555 per sample levelled off from around 8000 cal. yr BP at Torfdalsvatn, whereas it showed an

556 almost linear increase of 3.5 taxa per millennium for Nykurvatn (Fig. 8D). The species pool at  
557 Torfdalsvatn showed a steep increase from 11,600 to ~9000 cal. yr BP, and a continuous  
558 increase after that (Fig. 8D). The initial increase at Nykurvatn was even steeper, and continues  
559 to increase until present. The detected regional species pool based on both lakes and review of  
560 earlier records shows a steep increase until around 8000 cal. yr BP, when >80% of the total  
561 taxa had arrived, and hardly any new taxa after 4500 cal. yr BP (Fig. 8D).

562

563

## 564 5. Discussion

565 Our records characterising Early Holocene vegetation and plant communities reflect summer  
566 temperature conditions in accordance with previous Holocene Thermal Maximum  
567 reconstructions (Caseldine et al., 2006; Eddudóttir et al., 2015; Hallsdóttir and Caseldine,  
568 2005; Harning et al., 2018). Fig. 9 summarises key vegetation data from each site compared to  
569 sea-ice proxy IP<sub>25</sub> data from the North Iceland shelf (Cabedo-Sanz et al., 2016; Xiao et al.,  
570 2017) and reconstructed mean summer air temperature anomalies from Northwest Iceland  
571 (Harning et al., 2020). The largest changes in taxonomic composition and dominance were  
572 observed at Torfdalsvatn at the onset of the Holocene warming around 10,100 cal. yr BP,  
573 coinciding with peak summer insolation (Berger and Loutre, 1991), and at Landnám about  
574 1000 years ago. The Nykurvatn record starts at 8600 cal. yr BP, and exhibits the largest shift  
575 following Landnám, although without statistical significance. Furthermore, minor changes  
576 were observed in both records, mainly in the aquatic macrophytes. While the taxonomic  
577 composition was rather stable from 10,100-1000 cal. yr BP, the proportion of different plant  
578 functional groups fluctuated. The majority of taxa immigrated before 8000 cal. yr BP, thus  
579 prior to the Holocene Thermal Maximum (Geirsdóttir et al., 2020). The peak immigration was

580 around 10,000 cal. yr BP, when (Fig. 9), when occasional sea ice connected Iceland to  
581 northern Scandinavia and Russia (Alsos et al., 2016).

582

583

#### 584 5.1 Possible glacial survival of high arctic species

585 The assemblage of high arctic taxa found in the oldest samples at Torfdalsvatn, suggests that  
586 these might have survived the LGM in Iceland. However, as we have no sediments older than  
587 *c.* 11,600 cal. yr BP, we have no direct proof of glacial survival. Glacial survival of high  
588 arctic forbs, graminoids and bryophytes is less controversial and has also been found in a  
589 LGM refugium in northern Norway (Alsos et al., 2020). In our current study, possible glacial  
590 survival taxa based on their occurrence in the three oldest samples are *Saxifraga cespitosa*,  
591 *Saxifraga cernua* and/or *rivularis* and *Phippsia algida*. For *S. cernua*, a considerable  
592 intermingling in the amphi-Atlantic region was inferred, whereas no genetic variation was  
593 detected within the region in *P. algida* (Aares et al., 2000; Brochmann et al., 2003; Bronken,  
594 2001). We are not aware of any phylogeographical studies of *S. cespitosa* that include Iceland,  
595 but a study of populations in Svalbard and Norway concludes high dispersal potential  
596 (Brochmann et al., 2003; Tollefsrud et al., 1998). Notably, potential glacial survival has been  
597 suggested for *S. rivularis* in Svalbard, but not in Iceland, based on studies of AFLP  
598 fingerprinting (Westergaard et al., 2010). Thus, our new data neither prove nor disprove  
599 glacial survival.

600

#### 601 5.2 Colonisation of plants

602 The initial steep increase in accumulated species richness at both sites represents an  
603 overestimation of colonisation at that time. For Torfdalsvatn, we know that many of the taxa  
604 were present earlier (Rundgren, 1998, 1995), and for Nykurvatn, our record does not include



605 the earliest vegetation in the region. Thus, numerous species arrived prior to their being  
606 detected in our *sedaDNA* records (Figs 8-9). Also, it takes time from the first arrival of a  
607 propagule to become spread around Iceland. Therefore, it is likely that the massive  
608 immigration mainly took place prior to 10,100 cal. yr BP. Sea ice between Iceland and North  
609 Norway was common to dense prior to 11,000 cal. yr BP (Alsos et al., 2016). In addition,  
610 catastrophic draining of the Baltic Ice Lake around 11,700 cal. yr BP caused meltwater and  
611 potentially ice loaded with sediments to drift into the Nordic Seas (Björck, 1995; Nesje et al.,  
612 2004). Both sea ice and drift ice have already been identified as a major dispersal vector for  
613 beetles to Iceland (Panagiotakopulu, 2014). After that, sea ice was only found occasionally  
614 around Iceland 11,000-8000 cal. yr BP (Alsos et al., 2016), and may have been completely  
615 absent on the North Iceland shelf 11,700-6800 cal. yr BP (Fig. 9, Xiao et al., 2017). This  
616 direct evidence of a massive immigration prior to 10,100 cal. yr BP. supports that sea ice may  
617 have acted as an important dispersal vector either by direct transport of diaspores or by a  
618 combination of wind and sea ice (Alsos et al., 2016; Panagiotakopulu, 2014), although other  
619 dispersal vectors as birds, wind and sea current also may have contributed (Alsos et al., 2015).

620

621 From around 8000 cal. yr BP, hardly any taxa of trees, shrubs, dwarf shrubs, aquatic  
622 macrophytes or cryptogams were detected in the lake records. These are functional groups  
623 that have rather few taxa in Iceland (Wąsowicz, 2020). There are, however, more taxa of these  
624 groups in the assumed main source regions Scandinavia and the British Isles (Elven, 2005;  
625 Stace, 1997). As aquatic macrophytes are well dispersed by birds and appeared within 1-3  
626 decades after warming in western Norway (Birks, 2000), they may not be limited by  
627 availability of sea ice. They may, however, be limited by nutrients and light availability or  
628 other factors related to habitat diversity in Iceland. Trees, shrubs, dwarf shrubs, and

629 cryptogams on the other hand, might have been more limited by lack of sea ice in the Middle  
630 Holocene.

631  
632 In contrast, new taxa of forbs, graminoids, and bryophytes continued to be detected until 4500  
633 cal. yr BP (bryophytes until present). Forb is the functional group with the highest number of  
634 taxa in total (Fig. 8). The majority of forbs rely on insects for pollination. Thus, late  
635 colonisation of forbs may be due to pollinator limitation. The arrival time for most pollinators  
636 is not known (Panagiotakopulu, 2014). However, we note that most forb taxa and most  
637 graminoids that are only recorded after 4500 cal. yr BP are found scattered in a few samples  
638 and only in a few of the PCR repeats (Figs 5 and 8). As the ability to detect rare taxa in  
639 *sedaDNA* is limited (Alsos et al., 2018), they may represent scattered records of taxa that  
640 were also present earlier. Indeed, *Saxifraga oppositifolia* was recorded on Svalbard and  
641 Greenland 11,000-10,000 cal. yr BP (Bennike et al., 1999; Bennike and Hedenäs, 1995), so it  
642 is not unlikely that it was also present in Iceland at that time. The late arriving bryophytes  
643 however, were detected in many samples and often all eight PCR repeats, suggesting that  
644 these taxa are less likely to have been overlooked in earlier samples. Bryophytes have small  
645 spores that in general are widely dispersed. Furthermore, they are important pioneers on  
646 volcanic substrate, producing organic material for secondary colonisers (Ingimundardóttir et  
647 al., 2014). While late arrival of some species cannot be excluded, the cooler conditions during  
648 the Little Ice Age (AD 1250/1500-1900, Mann, 2002) may have made bryophytes more  
649 abundant and thus more likely to be detected.

650  
651 The overall accumulation of plant taxa in Iceland is greatest during the Late Glacial and Early  
652 Holocene (>80% before 8000 cal. yr BP). Furthermore, these records from Iceland exhibit an  
653 earlier accumulation compared to an accumulation curve for plant taxa based on *sedaDNA*

654 analyses of ten lakes in northern Fennoscandia ( $\frac{2}{3}$  before 8000 cal. yr BP, Rijal et al., 2020).  
655 This could be related either to species source pools or dispersal vectors. The flora in Iceland's  
656 main source regions, Scandinavia (Elven, 2005) and the British Isles (Stace, 1997), are about  
657 four times as large as the flora of Iceland (Alsos et al., 2015; Wąsowicz, 2020). While some  
658 of these species require warmer conditions than currently found in Iceland, it is clear that  
659 there is a large species pool that never made it across the ocean. Thus, we do not think that the  
660 size of the source pool *sensu* (Harrison, 2020) has limited colonisation of plants in Iceland. As  
661 our *sedaDNA* record is based on only two lakes, both lacking the basal sediments, the  
662 difference between Iceland and northern Fennoscandia is likely underestimated. The  
663 accelerated accumulation of taxa in Iceland compared to northern Fennoscandia may relate to  
664 the disappearance of the main dispersal vector (sea ice) during the Middle Holocene, and  
665 therefore we did not observe the same dispersal lag as in northern Fennoscandia (Rijal et al.,  
666 2020).

667  
668 Ultimately, if sea ice has been an important natural vector for plant dispersal to Iceland as our  
669 data suggest, we may not expect a wave of immigration of new taxa to Iceland due to the  
670 decreased ice cover following ongoing climate change. Furthermore, most modern sea ice  
671 originates from the Arctic Ocean, and is transported south through the Denmark Strait by the  
672 East Greenland Current. Anthropochore introduction, however, is assumed to increase unless  
673 measures are taken (Wasowicz et al., 2013).

674

### 675 5.3 Early Holocene vegetation development

676 The Saksunarvatn tephra layer provides a firm tie point between our TDV core and cores from  
677 Torfdalsvatn previously investigated by Rundgren (1995) and Florian (2016), and magnetic  
678 susceptibility provided additional alignment to the core by Florian (2016). As in the Rundgren

679 (1995) study, the Saksunarvatn tephra overlaid a layer of clayey gyttja, which again overlays  
680 a layer of clay. We did not observe the Vedde tephra layer (12,100 cal. yr BP, Rasmussen et  
681 al., 2006), thus TDV only extends down to somewhere in the clay layer (pollen zone T4-T5)  
682 of Rundgren (1995).

683

684 The lowest part of our core (TDV-DNA1) is dominated by bryophytes with some *Saxifraga*,  
685 which aligns with the T4 zone of low pollen concentrations detected by Rundgren (1995).

686 This is also the period with the highest proportion of unidentified sequences (Fig. 6). As the  
687 majority of bryophytes and vascular plants known from Iceland are covered in our reference  
688 library, the unidentified sequences likely reflect algae, which have limited reference material  
689 available for the marker used. This aligns with assumed high autochthonous production of  
690 algae based on algal pigments and a low ratio of total organic carbon to biogenic silica  
691 (Florian, 2016).

692

693 In our core, the bryophytes are rapidly replaced by high proportions of *Saxifraga* species,  
694 while graminoids remain common and peak around 10,800 cal. yr BP. This likely corresponds  
695 to the increase in grass pollen exhibited in pollen zone T5 of Rundgren (1995). Thereafter,  
696 both *sedaDNA* and pollen (T6) show an overall high number of taxa; such as *Salix*, *Empetrum*  
697 *nigrum*, *Oxyria digyna*, *Koenigia islandica*, *Ranunculus*, Caryophyllaceae (identified to  
698 *Cerastium alpinum/nigrescens* and *Silene acaulis* in *sedaDNA*), and *Hornungia* type pollen  
699 (identified to *Cardamine polemonioides* in *sedaDNA*)(Rundgren, 1998, 1995). This is a  
700 period characterised by increasing ratios of carbon to nitrogen and total organic carbon to  
701 biogenic silica (Florian, 2016), suggesting enhanced terrestrial production.

702

703 Our TDV-DNA2 (10,100-6700 cal. yr BP) is characterised by the appearance of *Juniperus*  
704 *communis*, which is assumed to correspond to pollen zone T8. In contrast to the previous  
705 record (Rundgren, 1998), we observed a massive immigration of new taxa at this transition,  
706 especially of forbs which are generally poorly represented in pollen. The transition to pollen  
707 zone T9 at around 8700 cal. yr BP is mainly quantitative, and could not easily be aligned with  
708 any change in the DNA data (falls within TDV-DNA2). Note that the two dates Rundgren has  
709 from T9 are reversed (7940 $\pm$ 130 and 7860 $\pm$ 120 BP). Also, there is a 4000 year hiatus in  
710 the record of Rundgren (1998), so his analyses stop here. Soon after, the first aquatic  
711 macrophytes appear in our DNA record, and they become the most dominant group in terms  
712 of DNA reads. This aligns with the increase in  $\delta^{13}\text{C}$  just after deposition of the Saksunarvatn  
713 tephra layer, supporting an increase in organic production by aquatic macrophytes (Florian,  
714 2016) consistent with a clearer water column following the reduced minerogenic influx also  
715 shown here by the MS profile (Fig 9A). The  $\delta^{13}\text{C}$  remains higher than -20‰ until the last  
716 millennium (Florian, 2016), which agrees with the high proportion of DNA reads identified as  
717 aquatic macrophytes. The high proportion of aquatic macrophytes may also explain the lower  
718 richness detected at Torfdalsvatn compared to Nykurvatn, as the richness of terrestrial taxa  
719 may be underestimated when >50% of the DNA reads are originating from aquatic taxa (Rijal  
720 et al., 2020).

721

722

#### 723 5.4. Vegetation development during Middle and Late Holocene

724 At Nykurvatn, no significant changes in vegetation composition were found for the entire  
725 period of 8600 years, suggesting a very stable flora. While we cannot distinguish *Betula nana*  
726 from *B. pubescens* based on the DNA region studied, the lack of other forest taxa (e.g., few  
727 ferns) and the scattered occurrence of *Juniperus communis* (<8 PCR repeats except around

728 8000-7000 cal. yr BP) suggest that forest never developed at this site. Thus, this was therefore  
729 not affected by oscillations in *Juniperus communis* and *Betula* cover. This interpretation is  
730 supported by pollen studies from the northwestern highland (416 m a.s.l), where sensitivity to  
731 climate and tephra deposition is demonstrated by floral communities in which the  
732 thermophilous (Iceland) *Betula pubescens* is prominent (Eddudóttir et al., 2016, 2017). The  
733 variations in LOI and Ti/Sum are likely caused by the numerous silt-sand sized tephra beds as  
734 well as input of minerogenic material from runoff and aeolian activity, rather than major  
735 environmental change within this period.

736

737 The occurrence of the non-native tall shrub/tree *Alnus* at 5200 and 200 cal. yr BP is somewhat  
738 unexpected, especially as these do not fall within a warm period (Geirsdóttir et al., 2020). It  
739 may be difficult to distinguish small amounts of *seda*DNA from background contamination  
740 (Alsos et al., 2020). However, we have never recorded *Alnus* as contamination in our  
741 laboratory so far (Rijal et al., 2020). Also, the scattered occurrence of *Alnus* in some pollen  
742 records (Verhoeven and Louwye, 2015) suggests that it might have occurred in Iceland in the  
743 past.

744

745 At Torfdalsvatn, the transition to zone TDV-DNA3 (6700-2400 cal. yr BP) represents a minor  
746 change in the terrestrial vegetation, but rowan appears from 6500-4100 cal. yr BP. Rowan  
747 also appears in pollen diagrams from northern and southern Iceland from ~6000 and 4500 cal.  
748 yr BP (Eddudóttir et al., 2015; Hallsdóttir, 1995; Hallsdóttir and Caseldine, 2005). This tree  
749 species has a slightly more southern distribution than *Betula pubescens*. It is believed that its  
750 distribution is not limited by summer temperature *per se*, but rather by a combination of poor  
751 drought tolerance, adaptation to short growing seasons and cold requirement for bud burst  
752 (Raspe et al., 2000). This suggests that the winters were colder during this period, which

753 agrees with the re-occurrence of sea ice at the North Iceland shelf after *c.* 6800 cal. yr BP as  
754 indicated by IP<sub>25</sub> biomarker data (Xiao et al., 2017), and by the presence of quartz in marine  
755 sediment cores after *c.* 7000 cal. yr BP (Andrews et al., 2009). The disappearance of rowan  
756 around 4100 cal. yr BP is during a period with widespread ice cap expansion, decreasing  
757 biogenic silica and increased landscape instability (Geirsdóttir et al., 2020).

758  
759 There was a clear change in the aquatic flora of Torfdalsvatn with the aquatic macrophyte  
760 *Littorella uniflora* appearing from 6800 cal. yr BP. This is approximately the same time as  
761  $\delta^{15}\text{N}$  increases,  $\delta^{13}\text{C}$  decreases, and there is a shift in algal pigments (Florian, 2016), possibly  
762 related to lacustrine environmental changes. *Littorella uniflora* is rare in Iceland and not  
763 detected in Skagi today (Kristinsson, 2010) although its occurrence in the top samples  
764 suggests it is overlooked.

765  
766 The change in abundance of some taxa at the transition to TDV-DNA4 (2400 cal. yr BP) with  
767 scattered reappearance of some of the early high arctic taxa, such as *Silene acaulis* and *Oxyria*  
768 *digyna*, may be a result of the stepwise cooling that started in Iceland around 5000 cal. yr BP,  
769 with increased cooling around 2400 cal. yr BP (Geirsdóttir et al., 2020, 2019; Harning et al.,  
770 2020). A similar change was also observed at Nykurvatn, where *Oxyria digyna* and *Silene*  
771 *acaulis* increased from ~2000 cal. yr BP, and several arctic-alpines re-appeared.

772

773

## 774 5.5 Landnám, Medieval Climate Optimum and Little Ice Age

775 The clearest indication we observed of human impact was the sudden disappearance of  
776 *Juniperus communis* 1055 cal. yr BP (895 AD) at Torfdalsvatn and 910 cal. yr BP (1040 AD)  
777 at Nykurvatn. Some grazing may favour this species and it is therefore commonly taken as a

778 grazing indicator, especially of dry pastures (Vorren, 1986), although grazing reduces  
779 seedling survival (Thomas et al., 2007). The disappearance from the DNA record suggests  
780 that in addition to grazing, it was cut. This is a species that was used as fuel, fodder for sheep  
781 and as raw material for ropes and tools (Larsen and Others, 1990). A reduction in *Juniperus*  
782 *communis* has also been observed in pollen records from c. 1000 cal. yr BP (Eddudóttir et al.,  
783 2020, 2016). Additional indicators of Landnám were the increase in a few grass taxa at  
784 Nykurvatn, as well as the reduction in *A. sylvestris* and disappearance of *Angelica*  
785 *archangelica* at Torfdalsvatn. These are taxa that are known to be grazing sensitive and also  
786 decrease or disappear in pollen records (Eddudóttir et al., 2020; Erlendsson, 2007). The latter  
787 was also observed at Nykurvatn, but continued to grow there during the last 1000 years,  
788 probably because this is a higher altitude site less influenced by human land use. While the  
789 onset of the Medieval Climate Optimum coincides with Landnám, we did not see any strong  
790 indication of more thermophilic flora. Thus, the change at around 950 cal. yr BP at both sites  
791 (but only significant at Torfdalsvatn), is interpreted as mainly due to human impact.

792  
793 The increase of high arctic taxa such as *Oxyria digyna*, *Koenigia islandica*, *Epilobium*  
794 *anagallidifolium*, *Silene acaulis*, and *Dryas octopetala* at Torfdalsvatn and increase in  
795 bryophytes at Nykurvatn occur during the Little Ice Age. Thus, in addition to the impact of  
796 human land use, we see a clear effect of climate deterioration. This coincides with low  
797 summer air temperatures and increased sea-ice cover on the North Icelandic shelf (Fig. 9;  
798 Cabedo-Sanz et al., 2016; Miles et al., 2020).

799  
800



## 801 6. Conclusions

802 By using *seedaDNA*, we obtained detailed records of arrival of species and the vegetation  
803 history at one lowland and one higher-altitude lake in Iceland. Our records confirm the  
804 presence of a high arctic vegetation prior to peak Holocene warming. Moreover, the high  
805 taxonomic resolution of these records allows for the estimation of arrival time. Over 80% of  
806 the recorded taxa had arrived by 8000 cal. yr BP, prior to the Holocene Thermal Maximum in  
807 Iceland. The main immigration event coincides with a period of more extensive sea ice,  
808 supporting the hypothesis that sea ice was an important dispersal vector to Iceland. To further  
809 improve estimates of arrival time, more sites should be investigated across the island,  
810 focusing especially on records that span the Late Glacial/Holocene transition. We found that  
811 the taxonomic composition of the flora was remarkably stable until Landnám, when some  
812 land-use intolerant taxa gave way rapidly. While ongoing global warming will allow more  
813 species to thrive in the Icelandic environment, natural colonisation may be limited by  
814 reduction in sea ice resulting in a shift to anthropochore dominated dispersal.

815

## 816 Acknowledgements

817 We would like to thank Lasse Topstad and Luca Elliott for help with DNA extraction, Dilli P.  
818 Rijal for help with R script for data analyses, and Ellen Elverland for help with identifying  
819 macrofossils. Claus Falkenberg Thomsen kindly assisted during fieldwork at Nykurvatn.  
820 Þorsteinn Jónsson and Höskuldur Þorbjarnarson assisted with coring at Torfdalsvatn. Kurt H.  
821 Kjær and Marie-Louise Siggaard-Andersen, GLOBE Institute, kindly contributed with  
822 ITRAX sediment core scanning. Bioinformatic analyses were performed on resources  
823 provided by UNINETT Sigma2 - the National Infrastructure for High Performance  
824 Computing and Data Storage in Norway. This project has received funding from the European  
825 Research Council (ERC) under the European Union's Horizon 2020 research and innovation

826 programme (grant agreement No 819192 to Alsos), from the Arctic Research and Studies  
827 Program of the Ministries for Foreign Affairs of Norway and Iceland (grant agreement No.  
828 2017-ARS-79772 to Schomacker), the Icelandic Research Fund (grant no. 141842-051;  
829 Guðrún Gísladóttir), Landsvirkjun Energy Research Fund and the University of Iceland  
830 Research Fund.

831

### 832 [Author contributions](#)

833 Project idea IGA and AS; acquiring funding IGA, AS, EE, GG, ÍÖB, SB, WRF; coring SB,  
834 ÍÖB, EE, GG, SDE, WRF, AS; core sampling EMB, AR; lithology SEK, EMB, AR, AS;  
835 identification of plant macrofossils for radiocarbon dating EMB, SEK, AS; analyses of tephra  
836 EMB, ERG, WRF; age-depth modelling EMB, SEK, AS; DNA analyses MKFM and IGA;  
837 data analyses IGA and YL; manuscript draft IGA, AS, YL and SEK. All co-authors  
838 commented on the manuscript.

839

### 840 [Declaration of competing interests](#)

841 No competing interest to declare.

842

### 843 [Data availability](#)

844 Raw sequence read data will be uploaded on Dryad (XXXX). The data obtained after filtering  
845 are given in Supplementary data Table 4-5.

846

### 847 [Supplementary data](#)

848 **Supplementary Table S1.** Results from major element analyses on identified tephra layers  
849 and standard runs.

850

851 **Supplementary Table S2.** The number of unique barcodes and reads present in the data after  
852 each bioinformatic step.

853

854 **Supplementary Table S3.** Sequence identification with comments.

855

856 **Supplementary Table S4.** Final *seadNA* dataset for Torfdalsvatn (TDV) and Nykurvatn  
857 (NYK) given as the weighted number of PCR repeats.

858

859 **Supplementary Table S5.** DNA raw and filtered reads, technical and ecological quality  
860 scores and proportion of reads for functional groups and key species for Torfdalsvatn (TDV)  
861 and Nykurvatn (NYK).

862

863 **Supplementary Table S6.** First arrival of taxa based on the current study and previous  
864 review of all macrofossil and pollen studies (Alsos et al., 2016).

865

866 **Supplementary Figures S1-S14**

867

868

## 869 [References](#)

870 Aares, E., Nurminiemi, M., Brochmann, C., 2000. Incongruent phylogeographies in spite of similar  
871 morphology, ecology, and distribution: *Phippsia algida* and *P. concinna* (Poaceae) in the North  
872 Atlantic region. *Plant Syst. Evol.* 220, 241–261.

873 Alsos, I.G., Ehrich, D., Eidesen, P.B., Solstad, H., Westergaard, K.B., Schönswetter, P., Tribsch, A.,  
874 Birkeland, S., Elven, R., Brochmann, C., 2015. Long-distance plant dispersal to North Atlantic

- 875 islands: colonization routes and founder effect. *AoB Plants* 7.
- 876 <https://doi.org/10.1093/aobpla/plv036>
- 877 Alsos, I.G., Ehrich, D., Seidenkrantz, M.-S., Bennike, O., Kirchhefer, A.J., Geirsdottir, A., 2016. The  
878 role of sea ice for vascular plant dispersal in the Arctic. *Biol. Lett.* 12.
- 879 <https://doi.org/10.1098/rsbl.2016.0264>
- 880 Alsos, I.G., Eidesen, P.B., Ehrich, D., Skrede, I., Westergaard, K., Jacobsen, G.H., Landvik, J.Y.,  
881 Taberlet, P., Brochmann, C., 2007. Frequent long-distance colonization in the changing Arctic.  
882 *Science* 316, 1606–1609.
- 883 Alsos, I.G., Lammers, Y., Yoccoz, N.G., Jørgensen, T., Sjögren, P., Gielly, L., Edwards, M.E., 2018.  
884 Plant DNA metabarcoding of lake sediments: How does it represent the contemporary vegetation.  
885 *PLoS One* 13, e0195403.
- 886 Alsos, I.G., Sjögren, P., Brown, A.G., Gielly, L., Merkel, M.K.F., Paus, A., Lammers, Y., Edwards,  
887 M.E., Alm, T., Leng, M., Goslar, T., Langdon, C.T., Bakke, J., van der Bilt, W.G.M., 2020. Last  
888 Glacial Maximum environmental conditions at Andøya, northern Norway; evidence for a  
889 northern ice-edge ecological “hotspot.” *Quat. Sci. Rev.* 239, 106364.
- 890 Andrews, J.T., Darby, D., Eberle, D., Jennings, A.E., Moros, M., Ogilvie, A., 2009. A robust, multisite  
891 Holocene history of drift ice off northern Iceland: implications for North Atlantic climate.  
892 *Holocene* 19, 71–77.
- 893 Axford, Y., Miller, G.H., Geirsdóttir, Á., Langdon, P.G., 2007. Holocene temperature history of  
894 northern Iceland inferred from subfossil midges. *Quat. Sci. Rev.* 26, 3344–3358.
- 895 Benediktsson, J., 1968. *Islensk fornrit I. Íslendingabók – Landnámabók*. Hið íslenska fornleifafélag,  
896 Reykjavík.
- 897 Bennike, O., Björck, S., Böcher, J., Hansen, L., Heinemeier, J., Wohlfarth, B., 1999. Early holocene  
898 plant and animal remains from North-east Greenland. *J. Biogeogr.* 26, 667–677.
- 899 Bennike, O., Hedenäs, L., 1995. Early Holocene land floras and faunas from Edgeøya, Eastern  
900 Svalbard. *Polar Res.* 14, 205–214.
- 901 Berger, A., Loutre, M.F., 1991. Insolation values for the climate of the last 10 million years. *Quat. Sci.*  
902 *Rev.* 10, 297–317.

- 903 Birks, H.H., 2000. Aquatic macrophyte vegetation development in Kråkenes Lake, western Norway,  
904 during the late-glacial and early-Holocene. *J. Paleolimnol.* 23, 7–19.
- 905 Björck, S., 1995. A review of the history of the Baltic Sea, 13.0-8.0 ka BP. *Quat. Int.* 27, 19–40.
- 906 Björck, S., Ingólfsson, Ó., Hafliðason, H., Hallsdóttir, M., Anderson, N.J., 1992. Lake Torfadalsvatn:  
907 a high resolution record of the North Atlantic ash zone I and the last glacial-interglacial  
908 environmental changes in Iceland. *Boreas* 21, 15–22.
- 909 Björkman, A.D., Myers-Smith, I.H., Elmendorf, S.C., Normand, S., Rüger, N., Beck, P.S.A., Blach-  
910 Overgaard, A., Blok, D., Cornelissen, J.H.C., Forbes, B.C., Georges, D., Goetz, S.J., Guay, K.C.,  
911 Henry, G.H.R., HilleRisLambers, J., Hollister, R.D., Karger, D.N., Kattge, J., Manning, P.,  
912 Prevéy, J.S., Rixen, C., Schaepman-Strub, G., Thomas, H.J.D., Vellend, M., Wilmking, M., Wipf,  
913 S., Carbognani, M., Hermanutz, L., Lévesque, E., Molau, U., Petraglia, A., Soudzilovskaia, N.A.,  
914 Spasojevic, M.J., Tomaselli, M., Vowles, T., Alatalo, J.M., Alexander, H.D., Anadon-Rosell, A.,  
915 Angers-Blondin, S., Beest, M. te, Berner, L., Björk, R.G., Buchwal, A., Buras, A., Christie, K.,  
916 Cooper, E.J., Dullinger, S., Elberling, B., Eskelinen, A., Frei, E.R., Grau, O., Grogan, P.,  
917 Hallinger, M., Harper, K.A., Heijmans, M.M.P.D., Hudson, J., Hülber, K., Iturrate-Garcia, M.,  
918 Iversen, C.M., Jaroszynska, F., Johnstone, J.F., Jørgensen, R.H., Kaarlejärvi, E., Klady, R.,  
919 Kuleza, S., Kulonen, A., Lamarque, L.J., Lantz, T., Little, C.J., Speed, J.D.M., Michelsen, A.,  
920 Milbau, A., Nabe-Nielsen, J., Nielsen, S.S., Ninot, J.M., Oberbauer, S.F., Olofsson, J.,  
921 Onipchenko, V.G., Rumpf, S.B., Semenchuk, P., Shetti, R., Collier, L.S., Street, L.E., Suding,  
922 K.N., Tape, K.D., Trant, A., Treier, U.A., Tremblay, J.-P., Tremblay, M., Venn, S., Weijers, S.,  
923 Zamin, T., Boulanger-Lapointe, N., Gould, W.A., Hik, D.S., Hofgaard, A., Jónsdóttir, I.S.,  
924 Jorgenson, J., Klein, J., Magnusson, B., Tweedie, C., Wookey, P.A., Bahn, M., Blonder, B., van  
925 Bodegom, P.M., Bond-Lamberty, B., Campetella, G., Cerabolini, B.E.L., Chapin, F.S., Cornwell,  
926 W.K., Craine, J., Dainese, M., de Vries, F.T., Díaz, S., Enquist, B.J., Green, W., Milla, R.,  
927 Niinemets, Ü., Onoda, Y., Ordoñez, J.C., Ozinga, W.A., Penuelas, J., Poorter, H., Poschold, P.,  
928 Reich, P.B., Sandel, B., Schamp, B., Sheremetev, S., Weiher, E., 2018. Plant functional trait  
929 change across a warming tundra biome. *Nature* 562, 57–62.
- 930 Blaauw, M., Christen, J.A., 2013. Bacon Manual v2. 3.3.

- 931 Boyer, F., Mercier, C., Bonin, A., Le Bras, Y., Taberlet, P., Coissac, E., 2016. OBITOOLS: a unix-  
932 inspired software package for DNA metabarcoding. *Mol. Ecol. Resour.* 16, 176–182.
- 933 Brochmann, C., Gabrielsen, T.M., Nordal, I., Landvik, J.Y., Elven, R., 2003. Glacial survival or *tabula*  
934 *rasa*? The history of North Atlantic biota revisited. *Taxon* 52, 417–450.
- 935 Bronken, P., 2001. Circumpolar chloroplast and nuclear DNA variation in *Saxifraga cernua*.  
936 University of Oslo, Oslo.
- 937 Bronk Ramsey, C., 2009. Bayesian analysis of radiocarbon dates. *Radiocarbon* 51, 337–360.
- 938 Cabedo-Sanz, P., Belt, S.T., Jennings, A.E., Andrews, J.T., Geirsdóttir, Á., 2016. Variability in drift  
939 ice export from the Arctic Ocean to the North Icelandic Shelf over the last 8000 years: A multi-  
940 proxy evaluation. *Quat. Sci. Rev.* 146, 99–115.
- 941 CAFF, 2013. Arctic Biodiversity Assessment: The full scientific report. CAFF - Conservation of  
942 Arctic Flora and Fauna, Akureyri, Iceland.
- 943 Caseldine, C., Langdon, P., Holmes, N., 2006. Early Holocene climate variability and the timing and  
944 extent of the Holocene thermal maximum (HTM) in northern Iceland. *Quat. Sci. Rev.* 25, 2314–  
945 2331.
- 946 Clarke, C.L., Alsos, I.G., Edwards, M.E., Paus, A., Gielly, L., Haflidason, H., Mangerud, J., Hughes,  
947 P.D.M., Svendsen, J.I., Bjune, A.E., 2020. A 24,000-year ancient DNA and pollen record from  
948 the Polar Urals reveals temporal dynamics of arctic and boreal plant communities.
- 949 Core, R., 2015. Team. R: a language and environment for statistical computing.
- 950 Croudace, I.W., Rindby, A., Guy Rothwell, R., 2006. ITRAX: description and evaluation of a new  
951 multi-function X-ray core scanner. Geological Society, London, Special Publications.  
952 <https://doi.org/10.1144/gsl.sp.2006.267.01.04>
- 953 Dugmore, A.J., Cook, G.T., Shore, J.S., Newton, A.J., Edwards, K.J., Larsen, G., 1995. Radiocarbon  
954 Dating Tephra Layers in Britain and Iceland. *Radiocarbon*.  
955 <https://doi.org/10.1017/s003382220003085x>
- 956 Eddudóttir, S.D., Erlendsson, E., Gísladóttir, G., 2020. Landscape change in the Icelandic highland: A  
957 long-term record of the impacts of land use, climate and volcanism. *Quat. Sci. Rev.* 240, 106363.
- 958 Eddudóttir, S.D., Erlendsson, E., Gísladóttir, G., 2015. Life on the periphery is tough: Vegetation in

- 959 Northwest Iceland and its responses to early-Holocene warmth and later climate fluctuations.  
960 Holocene 25, 1437–1453.
- 961 Eddudóttir, S.D., Erlendsson, E., Tinganelli, L., Gísladóttir, G., 2016. Climate change and human  
962 impact in a sensitive ecosystem: the Holocene environment of the Northwest Icelandic highland  
963 margin. *Boreas*. <https://doi.org/10.1111/bor.12184>
- 964 Eidesen, P.B., Ehrich, D., Bakkestuen, V., Alsos, I.G., Gilg, O., Taberlet, P., Brochmann, C., 2013.  
965 Genetic roadmap of the Arctic: plant dispersal highways, traffic barriers and capitals of diversity.  
966 *New Phytol.* 200, 898–910.
- 967 Elven, R., 2005. *Norsk Flora (= Lids Flora)*.
- 968 Erlendsson, E., 2007. Environmental change around the time of the Norse settlement of Iceland.  
969 University of Aberdeen.
- 970 Felde, V.A., Grytnes, J.-A., Bjune, A.E., Peglar, S.M., Birks, H.J.B., 2018. Are diversity trends in  
971 western Scandinavia influenced by post-glacial dispersal limitation? *J. Veg. Sci.* 29, 360–370.
- 972 Florian, C.R., 2016. Multi-Proxy reconstructions of Holocene environmental change and catchment  
973 biogeochemistry using algal pigments and stable isotopes preserved in lake sediment from Baffin  
974 Island and Iceland (PhD). University of England.
- 975 Forwick, M., 2013. How to use XRF core scanner data acquired with the Avaatech XRF core scanner  
976 at the Department of Geology, University of Tromsø. A short manual. University of Tromsø,  
977 Department of Geology.
- 978 Geirsdóttir, Á., Harning, D.J., Miller, G.H., Andrews, J.T., Zhong, Y., Caseldine, C., 2020. Holocene  
979 history of landscape instability in Iceland: Can we deconvolve the impacts of climate, volcanism  
980 and human activity? *Quat. Sci. Rev.* 249, 106633.
- 981 Geirsdóttir, Á., Miller, G.H., Andrews, J.T., Harning, D.J., Anderson, L.S., Florian, C., Larsen, D.J.,  
982 Thordarson, T., 2019. The onset of neoglaciation in Iceland and the 4.2 ka event. *Clim. Past* 15,  
983 25–40.
- 984 Giesecke, T., Wolters, S., Jahns, S., Brande, A., 2012. Exploring holocene changes in palynological  
985 richness in northern Europe--did postglacial immigration matter? *PLoS One* 7, e51624.
- 986 Giesecke, T., Wolters, S., van Leeuwen, J.F.N., van der Knaap, P.W.O., Leydet, M., Brewer, S., 2019.

- 987 Postglacial change of the floristic diversity gradient in Europe. *Nat. Commun.* 10, 5422.
- 988 Graae, B.J., Pagh, S., Bruun, H.H., 2004. An experimental evaluation of the arctic fox (*Alopex*  
989 *lagopus*) as a seed disperser. *Arct. Antarct. Alp. Res.* 36, 468–473.
- 990 Gudmundsdóttir, E.R., Larsen, G., Eiríksson, J., 2012. Tephra stratigraphy on the North Icelandic  
991 shelf: extending tephrochronology into marine sediments off North Iceland. *Boreas* 41, 719–734.
- 992 Hallsdóttir, M., 1995. On the pre-settlement history of Icelandic vegetation (PhD thesis). University of  
993 Lund.
- 994 Hallsdóttir, M., 1987. Pollen analytical studies of human influence on vegetation in relation to the  
995 landnám tephra layer in Southwest Iceland.
- 996 Hallsdóttir, M., Caseldine, C., 2005. The Holocene vegetation history of Iceland, state-of-the-art and  
997 future research, in: Caseldine, C., Russell, A., Hardardóttir, J., Knudsen, O. (Eds.), *Modern*  
998 *Processes and Past Environments*. Elsevier, Amsterdam.
- 999 Harning, D.J., Curtin, L., Geirsdóttir, Á., D’Andrea, W.J., Miller, G.H., Sepúlveda, J., 2020. Lipid  
1000 biomarkers quantify Holocene summer temperature and ice cap sensitivity in Icelandic lakes.  
1001 *Geophys. Res. Lett.* 47. <https://doi.org/10.1029/2019gl085728>
- 1002 Harning, D.J., Geirsdóttir, Á., Miller, G.H., 2018. Punctuated Holocene climate of Vestfirðir, Iceland,  
1003 linked to internal/external variables and oceanographic conditions. *Quat. Sci. Rev.* 189, 31–42.
- 1004 Harrison, S., 2020. Plant community diversity will decline more than increase under climatic warming.  
1005 *Philos. Trans. R. Soc. Lond. B Biol. Sci.* 375, 20190106.
- 1006 Harter, D.E.V., Irl, S.D.H., Seo, B., Steinbauer, M.J., Gillespie, R., Triantis, K.A., Fernández-Palacios,  
1007 J.-M., Beierkuhnlein, C., 2015. Impacts of global climate change on the floras of oceanic islands  
1008 – Projections, implications and current knowledge. *Perspect. Plant Ecol. Evol. Syst.* 17, 160–183.
- 1009 Heiri, O., Lotter, A.F., Lemcke, G., 2001. Loss on ignition as a method for estimating organic and  
1010 carbonate content in sediments: reproducibility and comparability of results. *J. Paleolimnol.* 25,  
1011 101–110.
- 1012 Icelandic Meteorological Office [WWW Document], 2020a. URL  
1013 [https://www.vedur.is/Medaltalstoflur-txt/Hraun\\_352\\_med6190.txt](https://www.vedur.is/Medaltalstoflur-txt/Hraun_352_med6190.txt) (accessed 8 of December  
1014 2020).



- 1015 Icelandic Meteorological Office [WWW Document], 2020b. URL  
1016 [https://www.vedur.is/Medaltalstoflur-txt/Stod\\_527\\_Skjaldtingsstadir.ArsMedal.txt](https://www.vedur.is/Medaltalstoflur-txt/Stod_527_Skjaldtingsstadir.ArsMedal.txt) (accessed 9 of  
1017 December 2020).
- 1018 Ingimundardóttir, G.V., Weibull, H., Cronberg, N., 2014. Bryophyte colonization history of the virgin  
1019 volcanic island Surtsey, Iceland. *Biogeosciences* 11, 4415–4427.
- 1020 *Islandicum*), D.I. (diplomatarium, 1857-1986. Íslenzkt fornbréfasafn III. Íslenzka bókmenntafélagið,  
1021 Kaupmannahöfn (Copenhagen).
- 1022 Johansen, S., Hytteborn, H., 2001. A contribution to the discussion of biota dispersal with drift ice and  
1023 driftwood in the North Atlantic. *J. Biogeogr.* 28, 105–115.
- 1024 Kristinsson, H., 2010. A guide to the flowering plants and ferns of Iceland, 3rd ed. Mál og menning,  
1025 Reykjavík.
- 1026 Kylander, M.E., Ampel, L., Wohlfarth, B., 2011. High-resolution X-ray fluorescence core scanning  
1027 analysis of Les Echets (France) sedimentary sequence: new insights from chemical proxies. *J.*  
1028 *Quat. Sci.*
- 1029 Langdon, P.G., Leng, M.J., Holmes, N., Caseldine, C.J., 2010. Lacustrine evidence of early-Holocene  
1030 environmental change in northern Iceland: a multiproxy palaeoecology and stable isotope study.  
1031 *Holocene* 20, 205–214.
- 1032 Larsen, A.-C., Others, 1990. Norsemen's use of juniper in Viking Age Faroe Islands. Norsemen's use  
1033 of juniper in Viking Age Faroe Islands. 61, 54–59.
- 1034 Larsen, G., Eiríksson, J., 2008. Late Quaternary terrestrial tephrochronology of Iceland—frequency of  
1035 explosive eruptions, type and volume of tephra deposits. *Journal of Quaternary Science.*  
1036 <https://doi.org/10.1002/jqs.1129>
- 1037 Larsen, G., Eiríksson, J., Knudsen, K.L., Heinemeier, J., 2002. Correlation of late Holocene terrestrial  
1038 and marine tephra markers, north Iceland: implications for reservoir age changes. *Polar Res.* 21,  
1039 283–290.
- 1040 Liu, S., Stoof-Leichsenring, K.R., Kruse, S., Pestryakova, L.A., Herzschuh, U., 2020. Holocene  
1041 vegetation and plant diversity changes in the north-eastern Siberian treeline region from pollen  
1042 and sedimentary ancient DNA. *Frontiers in Ecology and Evolution* 8, 304.

- 1043 Löve, A., Löve, D., 1963. North Atlantic biota and their History : a symposium held at the University  
1044 of Iceland, Reykjavík, July 1962 under the auspices of the University of Iceland and the Museum  
1045 of Natural History. Pergamon, Oxford.
- 1046 Lowe, D.J., 2011. Tephrochronology and its application: A review. *Quat. Geochronol.* 6, 107–153.
- 1047 Magnússon, Á., Vídalín, P., 1927. Jarðabók Árna Magnússonar og Páls Vídalín XIII. Hið íslenska  
1048 fræðafélag, Copenhagen.
- 1049 Mann, M.E., 2002. Little ice age. *Encyclopedia of global environmental change* 1, 504–509.
- 1050 Miles, M.W., Andresen, C.S., Dylmer, C.V., 2020. Evidence for extreme export of Arctic sea ice  
1051 leading the abrupt onset of the Little Ice Age. *Sci Adv* 6. <https://doi.org/10.1126/sciadv.aba4320>
- 1052 Möckel, S.C., Erlendsson, E., Gísladóttir, G., 2017. Holocene environmental change and development  
1053 of the nutrient budget of histosols in North Iceland. *Plant Soil* 418, 437–457.
- 1054 National Land Survey of Iceland [WWW Document], 2020. . Lýsigagnagátt. URL  
1055 <https://gatt.lmi.is/geonetwork/srv/eng/catalog.search#/home> (accessed 12.12.20).
- 1056 Nesje, A., Dahl, S.O., Bakke, J., 2004. Were abrupt Lateglacial and early-Holocene climatic changes  
1057 in northwest Europe linked to freshwater outbursts to the North Atlantic and Arctic Oceans?  
1058 *Holocene* 14, 299–310.
- 1059 Norðdahl, H., Ingólfsson, Ó., 2015. Collapse of the Icelandic ice sheet controlled by sea-level rise?  
1060 *arktos*. <https://doi.org/10.1007/s41063-015-0020-x>
- 1061 Óladóttir, B.A., Thordarson, T., Geirsdóttir, Á., Jóhannsdóttir, G.E., Mangerud, J., 2020. The  
1062 Saksunarvatn Ash and the G10ka series tephra. Review and current state of knowledge. *Quat.*  
1063 *Geochronol.* 56, 101041.
- 1064 Paillard, D., Labeyrie, L.D., Yiou, P., 1996. *AnalySeries 1.0*: a Macintosh software for the analysis of  
1065 geophysical time-series. EOS.
- 1066 Panagiotakopulu, E., 2014. Hitchhiking across the North Atlantic – Insect immigrants, origins,  
1067 introductions and extinctions. *Quat. Int.* 341, 59–68.
- 1068 Patton, H., Hubbard, A., Andreassen, K., Auriac, A., Whitehouse, P.L., Stroeven, A.P., Shackleton, C.,  
1069 Winsborrow, M., Heyman, J., Hall, A.M., 2017. Deglaciation of the Eurasian ice sheet complex.  
1070 *Quat. Sci. Rev.* 169, 148–172.

- 1071 Rasmussen, S.O., Andersen, K.K., Svensson, A.M., Steffensen, J.P., Vinther, B.M., Clausen, H.B.,  
1072 Siggaard-Andersen, M.-L., Johnsen, S.J., Larsen, L.B., Dahl-Jensen, D., Bigler, M.,  
1073 Röthlisberger, R., Fischer, H., Goto-Azuma, K., Hansson, M.E., Ruth, U., 2006. A new  
1074 Greenland ice core chronology for the last glacial termination. *J. Geophys. Res.* 111.  
1075 <https://doi.org/10.1029/2005jd006079>
- 1076 Raspe, O., Findlay, C., Jacquemart, A.-L., 2000. *Sorbus aucuparia* L. *J. Ecol.* 88, 910–930.
- 1077 Reimer, P.J., Austin, W.E.N., Bard, E., Bayliss, A., Blackwell, P.G., Ramsey, C.B., Butzin, M.,  
1078 Cheng, H., Lawrence Edwards, R., Friedrich, M., Grootes, P.M., Guilderson, T.P., Hajdas, I.,  
1079 Heaton, T.J., Hogg, A.G., Hughen, K.A., Kromer, B., Manning, S.W., Muscheler, R., Palmer,  
1080 J.G., Pearson, C., van der Plicht, J., Reimer, R.W., Richards, D.A., Marian Scott, E., Southon,  
1081 J.R., Turney, C.S.M., Wacker, L., Adolphi, F., Büntgen, U., Capano, M., Fahrni, S.M.,  
1082 Fogtmann-Schulz, A., Friedrich, R., Köhler, P., Kudsk, S., Miyake, F., Olsen, J., Reinig, F.,  
1083 Sakamoto, M., Sookdeo, A., Talamo, S., 2020. The IntCal20 Northern Hemisphere Radiocarbon  
1084 Age Calibration Curve (0–55 cal kBP). *Radiocarbon* 62, 725–757.
- 1085 Rijal, D.P., Heintzman, P.D., Lammers, Y., Yoccoz, N.G., Lorberau, K.E., Pitelkova, I., Goslar, T.,  
1086 Murguzur, F.J.A., Sakari Salonen, J., Helmens, K.F., Bakke, J., Edwards, M.E., Alm, T., Bräthen,  
1087 K.A., Brown, A.G., Alsos, I.G., 2020. Holocene plant diversity revealed by ancient DNA from 10  
1088 lakes in northern Fennoscandia. Cold Spring Harbor Laboratory.  
1089 <https://doi.org/10.1101/2020.11.16.384065>
- 1090 Roy, N., Bhiry, N., Woollett, J., Fréchette, B., 2018. Vegetation history since the mid-Holocene in  
1091 northeastern Iceland. *Écoscience* 25, 109–123.
- 1092 Rundgren, M., 1998. Early-Holocene vegetation of northern Iceland: pollen and plant macrofossil  
1093 evidence from the Skagi peninsula. *Holocene* 8, 553–564.
- 1094 Rundgren, M., 1997. Late Weichselian and early Holocene changes of vegetation, climate and sea  
1095 level on the Skagi peninsula, northern Iceland (PhD). University of Lund, Lund.
- 1096 Rundgren, M., 1995. Biostratigraphic Evidence of the Allerød-Younger Dryas-Preboreal Oscillation in  
1097 Northern Iceland. *Quat. Res.* 44, 405–416.
- 1098 Rundgren, M., Ingólfsson, O., 1999. Plant survival in Iceland during periods of glaciation? *J.*

- 1099 Biogeogr. 26, 387–396.
- 1100 Sæmundsson, T., 1995. Deglaciation and shoreline displacement in Vopnafjörður, North-eastern  
1101 Iceland (PhD). University of Lund, Lund.
- 1102 Savile, D.B.O., 1972. Arctic adaptations in plants. Canada department of agriculture Research Branch  
1103 Monograph 6, 1–81.
- 1104 Schaefer, H., 2003. Chorology and diversity of the Azorean flora. Stuttgart, J. Cramer.
- 1105 Smith, K.P., 1995. Landnám: The settlement of Iceland in archaeological and historical perspective.  
1106 World Archaeol. 26, 319–347.
- 1107 Sohmer, S.H., Gustafson, R., 1987. Plants and flowers of Hawaii. Times Edition, Honolulu.
- 1108 Soininen, E.M., Gauthier, G., Bilodeau, F., Berteaux, D., Gielly, L., Taberlet, P., Gussarova, G.,  
1109 Bellemain, E., Hassel, K., Stenøien, H.K., Epp, L., Schröder-Nielsen, A., Brochmann, C.,  
1110 Yoccoz, N.G., 2015. Highly overlapping diet in two sympatric lemming species during winter  
1111 revealed by DNA metabarcoding. PLoS One 10, e0115335.
- 1112 Sønstebø, J.H., Gielly, L., Brysting, A.K., Elven, R., Edwards, M., Haile, J., Willerslev, E., Coissac,  
1113 E., Rioux, D., Sannier, J., Taberlet, P., Brochmann, C., 2010. Using next-generation sequencing  
1114 for molecular reconstruction of past Arctic vegetation and climate. Mol. Ecol. Resour. 10, 1009–  
1115 1018.
- 1116 Stace, C.A., 1997. New Flora of the British Isles, 2nd ed. Cambridge University Press, Cambridge.
- 1117 Stewart, L., Alsos, I.G., Bay, C., Breen, A.L., Brochmann, C., Boulanger-Lapointe, N., Broennimann,  
1118 O., Bültmann, H., Bøcher, P.K., Damgaard, C., Daniëls, F.J.A., Ehrich, D., Eidesen, P.B., Guisan,  
1119 A., Jónsdóttir, I.S., Lenoir, J., le Roux, P.C., Lévesque, E., Luoto, M., Nabe-Nielsen, J.,  
1120 Schönswetter, P., Tribsch, A., Tveraabak, L.U., Virtanen, R., Walker, D.A., Westergaard, K.B.,  
1121 Yoccoz, N.G., Svenning, J.-C., Wisz, M., Schmidt, N.M., Pellissier, L., 2016. The regional  
1122 species richness and genetic diversity of Arctic vegetation reflect both past glaciations and  
1123 current climate. Glob. Ecol. Biogeogr. 25, 430–442.
- 1124 Svenning, J.-C., Eiserhardt, W.L., Normand, S., Ordonez, A., Sandel, B., 2015. The influence of  
1125 paleoclimate on present-day patterns in biodiversity and ecosystems. Annu. Rev. Ecol. Evol.  
1126 Syst. 46, 551–572.

- 1127 Taberlet, P., Coissac, E., Pompanon, F., Gielly, L., Miquel, C., Valentini, A., Vermat, T., Corthier, G.,  
1128 Brochmann, C., Willerslev, E., 2007. Power and limitations of the chloroplast trnL (UAA) intron  
1129 for plant DNA barcoding. *Nucleic Acids Res.* 35, e14.
- 1130 Thomas, P.A., El-Barghathi, M., Polwart, A., 2007. Biological Flora of the British Isles: *Juniperus*  
1131 *communis* L. *J. Ecol.* 95, 1404–1440.
- 1132 Tollefsrud, M.M., Bachmann, K., Jakobsen, K.S., Brochmann, C., 1998. Glacial survival does not  
1133 matter - II: RAPD phylogeography of Nordic *Saxifraga cespitosa*. *Mol. Ecol.* 7, 1217–1232.
- 1134 Verhoeven, K., Louwye, S., 2015. The Pleistocene palaeoenvironment and stratigraphy of Flatey  
1135 island (northern Iceland): a preliminary assessment based on palynomorphs. *Boreas* 44, 588–602.
- 1136 Vésteinsson, O., McGovern, T.H., 2012. The Peopling of Iceland. *Norwegian Archaeological Review*  
1137 45, 206–218.
- 1138 Voldstad, L.H., Alsos, I.G., Farnsworth, W.R., Heintzman, P.D., Håkansson, L., Kjellman, S.E.,  
1139 Rouillard, A., Schomacker, A., Eidesen, P.B., 2020. A complete Holocene lake sediment ancient  
1140 DNA record reveals long-standing high Arctic plant diversity hotspot in northern Svalbard. *Quat.*  
1141 *Sci. Rev.* 234, 106207.
- 1142 Vorren, K.D., 1986. The impact of early agriculture on the vegetation of Northern Norway. A  
1143 discussion of anthropogenic indicators in biostratigraphical data, in: Behre, K.-E. (Ed.),  
1144 *Anthropogenic Indicators in Pollen Diagrams*. A.A.Balkema, Rotterdam, pp. 1–18.
- 1145 Wąsowicz, P., 2020. Annotated checklist of vascular plants of Iceland. *Fjölrit Náttúrufræðistofnunar*.  
1146 <https://doi.org/10.33112/1027-832x.57>
- 1147 Wasowicz, P., Przedpelska-Wasowicz, E.M., Kristinsson, H., 2013. Alien vascular plants in Iceland:  
1148 Diversity, spatial patterns, temporal trends, and the impact of climate change. *Flora -*  
1149 *Morphology, Distribution, Functional Ecology of Plants* 208, 648–673.
- 1150 Weigelt, P., Steinbauer, M.J., Cabral, J.S., Kreft, H., 2016. Late Quaternary climate change shapes  
1151 island biodiversity. *Nature advance online publication*. <https://doi.org/10.1038/nature17443>  
1152 [http://www.nature.com/nature/journal/vaop/ncurrent/abs/nature17443.html#supplementary-](http://www.nature.com/nature/journal/vaop/ncurrent/abs/nature17443.html#supplementary-information)  
1153 [information](http://www.nature.com/nature/journal/vaop/ncurrent/abs/nature17443.html#supplementary-information)
- 1154 Westergaard, K.B., Jørgensen, M.H., Gabrielsen, T.M., Alsos, I.G., Brochmann, C., 2010. The

- 1155 extreme Beringian/Atlantic disjunction in *Saxifraga rivularis* (Saxifragaceae) has formed at least  
1156 twice. *J. Biogeogr.* 37, 1262–1276.
- 1157 Willerslev, E., Davison, J., Moora, M., Zobel, M., Coissac, E., Edwards, M.E., Lorenzen, E.D.,  
1158 Vestergard, M., Gussarova, G., Haile, J., Craine, J., Gielly, L., Boessenkool, S., Epp, L.S.,  
1159 Pearman, P.B., Cheddadi, R., Murray, D., Bråthen, K.A., Yoccoz, N., Binney, H., Cruaud, C.,  
1160 Wincker, P., Goslar, T., Alsos, I.G., Bellemain, E., Brysting, A.K., Elven, R., Sonstebo, J.H.,  
1161 Murton, J., Sher, A., Rasmussen, M., Ronn, R., Mourier, T., Cooper, A., Austin, J., Moller, P.,  
1162 Froese, D., Zazula, G., Pompanon, F., Rioux, D., Niderkorn, V., Tikhonov, A., Savvinov, G.,  
1163 Roberts, R.G., MacPhee, R.D.E., Gilbert, M.T.P., Kjaer, K.H., Orlando, L., Brochmann, C.,  
1164 Taberlet, P., 2014. Fifty thousand years of Arctic vegetation and megafaunal diet. *Nature* 506,  
1165 47–51.
- 1166 Xiao, X., Zhao, M., Knudsen, K.L., Sha, L., Eiríksson, J., Gudmundsdóttir, E., Jiang, H., Guo, Z.,  
1167 2017. Deglacial and Holocene sea–ice variability north of Iceland and response to ocean  
1168 circulation changes. *Earth Planet. Sci. Lett.* 472, 14–24.
- 1169 Þórhallsdóttir, Þ.E., 1996. Áhrif búsetu á landið, in: Grímsdóttir, G.Á. (Ed.), *Um Landnám á Íslandi –*  
1170 *Fjórtán Erindi*. Vísindafélag Íslendinga, Reykjavík.
- 1171

1172 **Tables**

1173 **Table 1. Radiocarbon ages from Torfdalsvatn (TDV) and Nykurvatn (NYK). Calibrated ages**  
 1174 **are median ages within the 2σ age ranges.**

| Core   | Original depth (cm) | Composite depth (cm) | Lab ID   | <sup>14</sup> C age (yr BP) | Calibrated age (cal. yr BP) | Calibrated 2σ age ranges (cal. yr BP) | δ <sup>13</sup> C (‰ VPDB) | Dated material           |
|--------|---------------------|----------------------|----------|-----------------------------|-----------------------------|---------------------------------------|----------------------------|--------------------------|
| TDV2-1 | 78-79               | 78-79                | Ua-67062 | 439 ± 27                    | 501                         | 529-463                               | -11.6                      | <i>Equisetum</i>         |
| TDV2-2 | 5-6                 | 130-131              | Ua-67063 | 1159 ± 28                   | 1065                        | 1178-972                              | -11.9                      | Graminoid                |
| TDV2-2 | 44-45               | 169-170              | Ua-67064 | 1419 ± 28                   | 1323                        | 1356-1290                             | -8.6                       | Twig                     |
| TDV2-3 | 49-50               | 314-315              | Ua-67065 | 2192 ± 29                   | 2232                        | 2314-2118                             | -9.3                       | <i>Equisetum?</i>        |
| TDV2-4 | 85-86               | 491-492              | Ua-67066 | 3603 ± 30                   | 3909                        | 4061-3832                             | -9.5                       | Graminoid                |
| TDV2-6 | 15-16               | 708-709              | Ua-67067 | 5819 ± 33                   | 6628                        | 6733-6500                             | -10.1                      | Graminoid                |
|        |                     |                      |          |                             |                             |                                       |                            | Twig ( <i>Betula</i>     |
| NYK1   | 48-49               | 48-49                | Ua-65341 | 3597 ± 31                   | 3902                        | 3984-3778                             | -23.9                      | sp.)                     |
| NYK1   | 103-104             | 103-104              | Ua-67058 | 1211 ± 28                   | 1128                        | 1247-1061                             | -14.6                      | Moss                     |
| NYK4   | 71-72               | 268-269              | Ua-67060 | 5091 ± 32                   | 5812                        | 5915-5746                             | -28.9                      | Twig                     |
| NYK3   | 143-144             | 270-271              | Ua-67059 | 5021 ± 34                   | 5773                        | 5895-5658                             | -19.9                      | Moss                     |
|        |                     |                      |          |                             |                             |                                       |                            | Leaf ( <i>Betula</i>     |
| NYK5   | 62-63               | 380-381              | Ua-65343 | 6125 ± 45                   | 7009                        | 7160-6890                             | –                          | <i>nana</i> (sp.)        |
| NYK5   | 80.5-81.5           | 398-399              | Ua-67061 | 6909 ± 35                   | 7734                        | 7834-7670                             | -26.6                      | Twig ( <i>Salix</i> sp.) |
|        |                     |                      |          |                             |                             |                                       |                            | Leaf ( <i>Salix</i>      |
| NYK5   | 133-134             | 451-452              | Ua-65344 | 7511 ± 38                   | 8335                        | 8391-8199                             | -28.0                      | <i>herbacea</i> )        |

1175

1176

1177 Table 2. Identified tephra marker layers from Torfdalsvatn (TDV) and Nykurvatn (NYK),  
1178 used for the age-depth models. H = Historical; R = Radiocarbon; I = Ice core.

| Tephra layer name (core, composite depth) | Volcanic system       | Silicic (S) Basaltic (B) | Tephra marker    | Age (cal. yr BP) | Age (yr BP) | Type of date | Reference for age        |
|-------------------------------------------|-----------------------|--------------------------|------------------|------------------|-------------|--------------|--------------------------|
| NYK61                                     | Veiðivötn-Bárðarbunga | B                        | V1477            | 470              | -           | H            | (Larsen et al., 2002)    |
| TDV115                                    | Hekla                 | S                        | Hekla 1104       | 850              | -           | H            | (Larsen et al., 2002)    |
| TDV407,<br>NYK136                         | Hekla                 | S                        | Hekla 3          | 3005 ± 57        | 2879 ± 34   | R            | (Dugmore et al., 1995)   |
| TDV505,<br>NYK198                         | Hekla                 | S                        | Hekla 4          | 4196 ± 33        | 3826 ± 12   | R            | (Dugmore et al., 1995)   |
| TDV839                                    | Grímsvötn             | B                        | Saksunarvatn Ash | 10267 ± 89       | -           | I            | (Rasmussen et al., 2006) |

1179

1180

1181



1182 **Figure legends**

1183

1184 Fig. 1. A. Overview map of the Arctic. Iceland is marked in black. B. Map of Iceland. The  
1185 box indicates the extent of C. C. Terrain shaded relief map of Northeast Iceland showing the  
1186 location of the two study areas. D. The area around Torfdalsvatn shown on an aerial  
1187 orthophotograph. E. The area around Nykurvatn shown on an aerial orthophotograph. The  
1188 imagery in C-E is available from the National Land Survey of Iceland (2020).

1189

1190 Fig. 2. Catchment overviews of Torfdalsvatn (A-B), and Nykurvatn (C-D). Photographs taken  
1191 June 2013 (G. Gísladóttir) and July 2017 (Í.Ö. Benediktsson), respectively.

1192

1193 Fig. 3. Age-depth models for Torfdalsvatn (A), and Nykurvatn (B). Details for all radiocarbon  
1194 ages are given in Table 1 and tephra marker layers in Table 2 and Supplementary Table S1.

1195 Fig. 4. Lithology, depths for *sead*DNA samples, identified tephra marker layers and calibrated  
1196 median ages for (A) Torfdalsvatn (TDV) and (B) Nykurvatn (NYK). In addition, magnetic  
1197 susceptibility (MS) and Ti/(inc+coh) are presented for TDV, and LOI (%) and Ti/Sum for  
1198 NYK.

1199

1200 Fig. 5. Taxa identified in the *sead*DNA metabarcoding analyses sorted according to plant  
1201 functional group (colour bars) and arrival time for Torfdalsvatn, Iceland. All data shown as  
1202 occurrence in weighted proportion of 8 PCR repeats (see methods). Assumed naturalised non-  
1203 native taxa are in red and with a star after the name. Zonation according to CONISS analyses  
1204 are shown with black lines, lithological units with black broken lines and the Saksunarvatn

1205 tephra in grey line. Note that some taxa names are shortened. See Supplementary Table S4 for  
1206 full taxa list.

1207

1208 Fig. 6. Vegetation development shown as proportion of reads for each functional group. The  
1209 proportion of terrestrial and aquatic reads is shown for Torfdalsvatn (A) and Nykurvatn (B),  
1210 along with the proportion of unidentified and partially identified reads. The proportion of  
1211 reads for terrestrial functional groups is shown for Torfdalsvatn (C) and Nykurvatn (D). For  
1212 Nykurvatn, the bryophytes, graminoids and cryptogams have average read proportions  $<0.01$   
1213 and thus are not clearly visible. Vertical lines in A and C denote the *se*daDNA zones  
1214 according to CONISS analyses.

1215

1216 Fig. 7. Taxa identified in the *se*daDNA metabarcoding analyses sorted according to plant  
1217 functional group (colour bars) and arrival time for Nykurvatn. All data shown as occurrence  
1218 in weighted proportion of 8 PCR repeats (see methods). One assumed naturalised non-native  
1219 taxon is in red and with a star after the name. Note that some taxa names are shortened. See  
1220 Supplementary Table S4 for full taxa list.

1221

1222 Fig. 8. Development in species richness, local and regional species pools in Iceland. Species  
1223 pool (defined as cumulative number of taxa) per functional type for Torfdalsvatn (A),  
1224 Nykurvatn (B), and both sites combined with the macrofossil and pollen data from Alsos et  
1225 al., 2016 (C). Vertical lines in A denote the *se*daDNA zones according to CONISS analyses,  
1226 while the vertical lines in C indicate the start of the Torfdalsvatn and Nykurvatn cores. (D)  
1227 Accumulated detected regional species pool as well as number of taxa detected per sample  
1228 along with the 95% confidence interval (grey shading) of the fitted line. Open circles  
1229 represent excluded samples, which were not used for the richness curves (Supplementary

1230 Table S6). The regional species pool is the data from both sites combined, along with the  
1231 macrofossil and pollen data from (Alsos et al., 2016).  
1232  
1233 Fig. 9. Lithology, *sedaDNA* zones from the CONISS analyses, magnetic susceptibility (MS,  
1234 Torfdalsvatn only), loss on ignition (LOI, Nykurvatn only), species richness, proportion of  
1235 reads for terrestrial plants, proportion of reads for trees and shrubs, and number of new taxa  
1236 recorded per 500 years (new taxa from both sites and Alsos et al., 2016) compared to regional  
1237 paleoclimate records. The IP<sub>25</sub> biomarker record is a proxy for sea ice from two marine  
1238 sediment cores at the North Iceland shelf (MD99-2269, Cabedo-Sanz et al., 2016; MD99-  
1239 2272, Xiao et al., 2017, note that even 11,000-7000 cal. yr BP, some sea ice was present NE  
1240 of Iceland occasionally connecting Iceland to N Scandianvia/Russia, Alsos et al., 2016). The  
1241 mean summer air temperature anomaly is based on the biomarker brGDGT from Skorarvatn,  
1242 Northwest Iceland (Harning et al., 2020). Grey shading indicates the propagated standard  
1243 error. The key to the lithology is given in Fig. 4. Results from Torfdalsvatn (A) and  
1244 Nykurvatn (B).  
1245

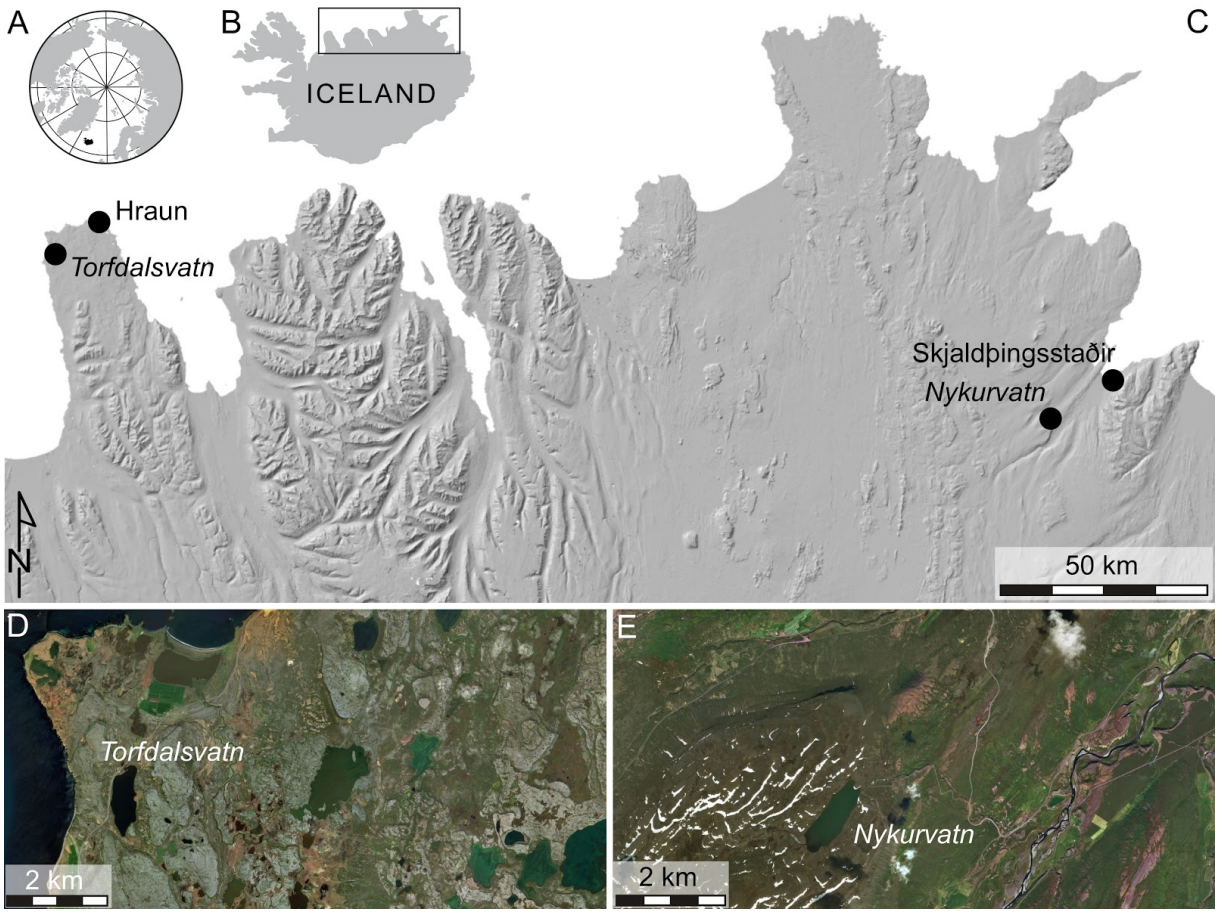

Fig 1

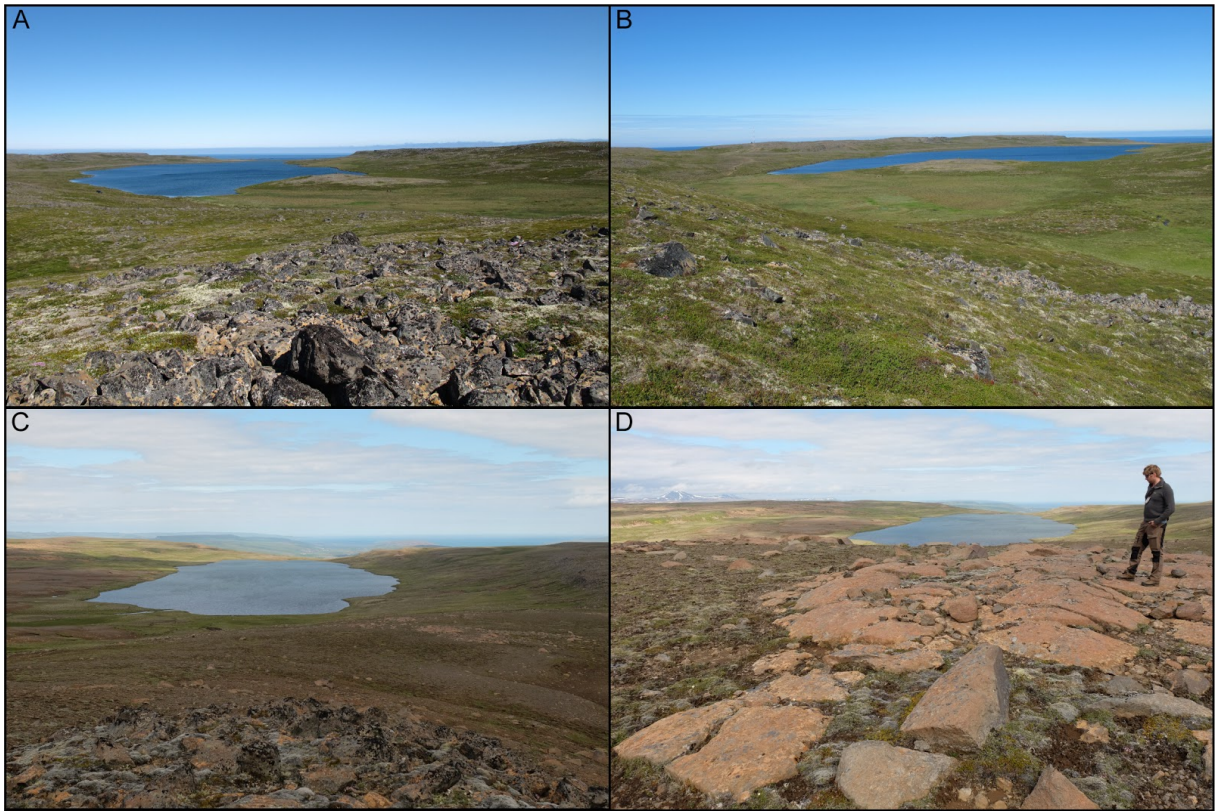

Fig. 2

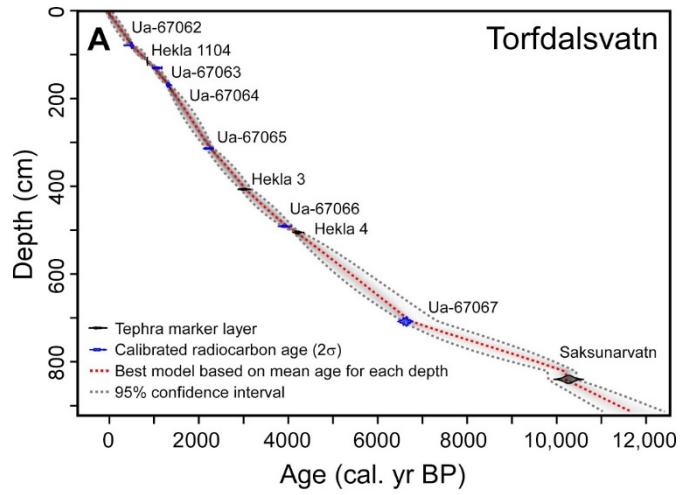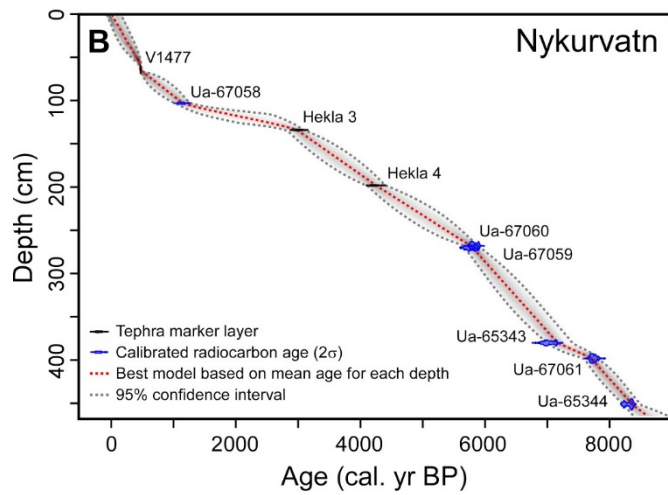

Fig. 3

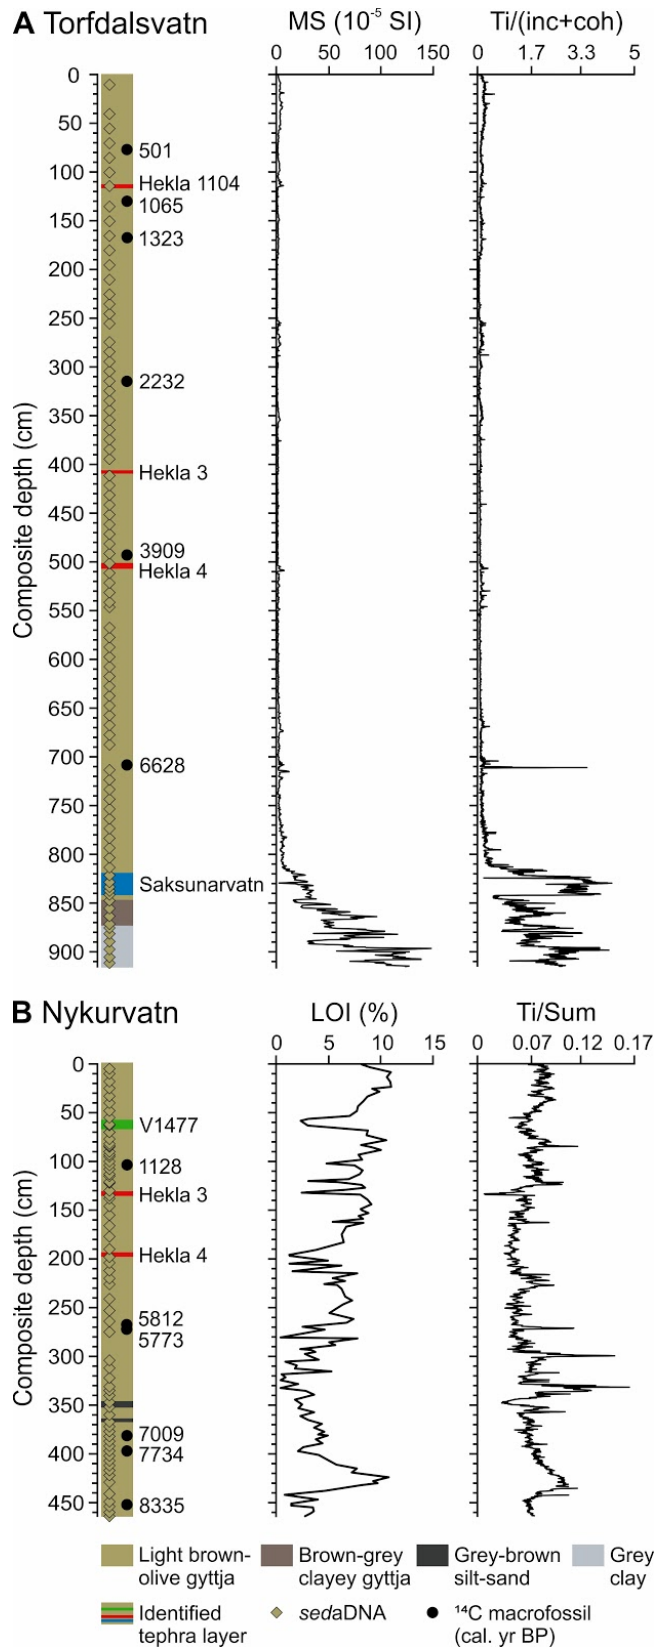

Fig. 4

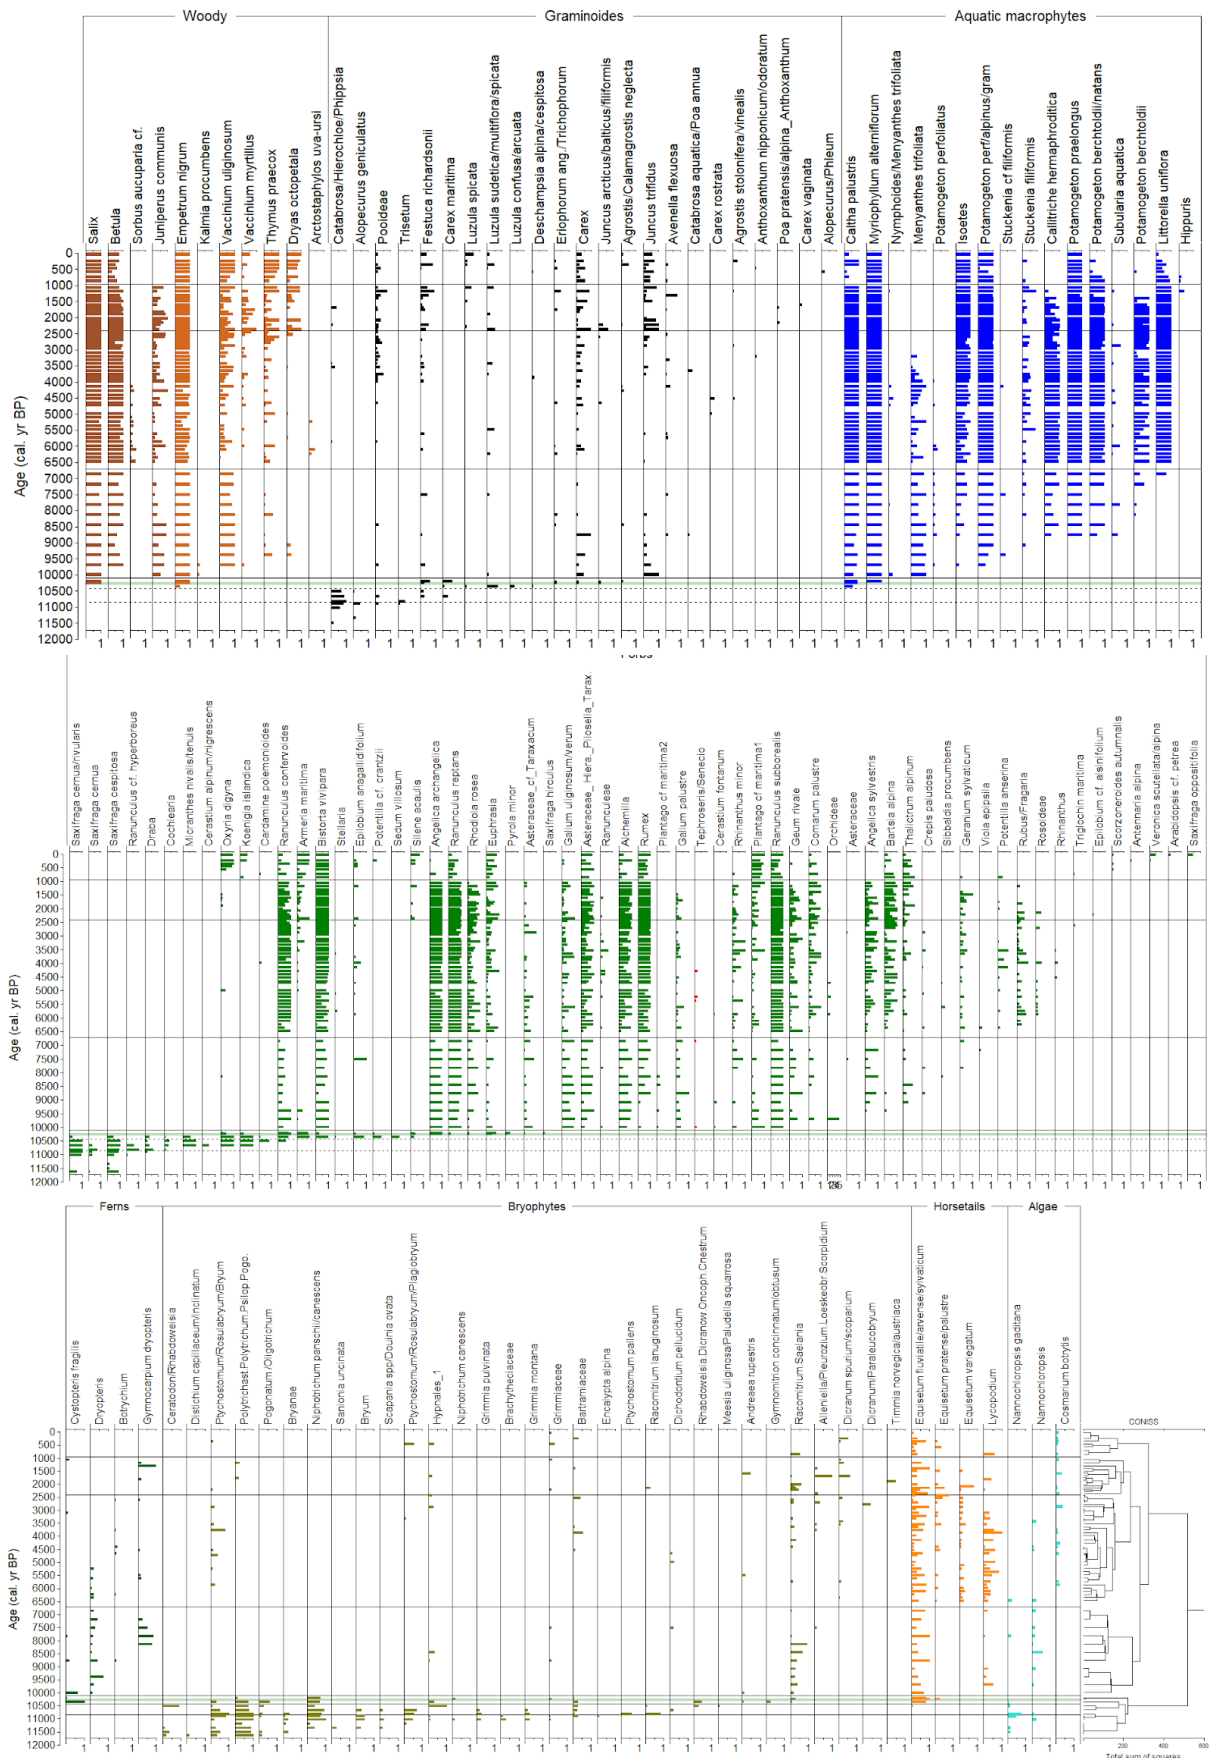

Fig. 5



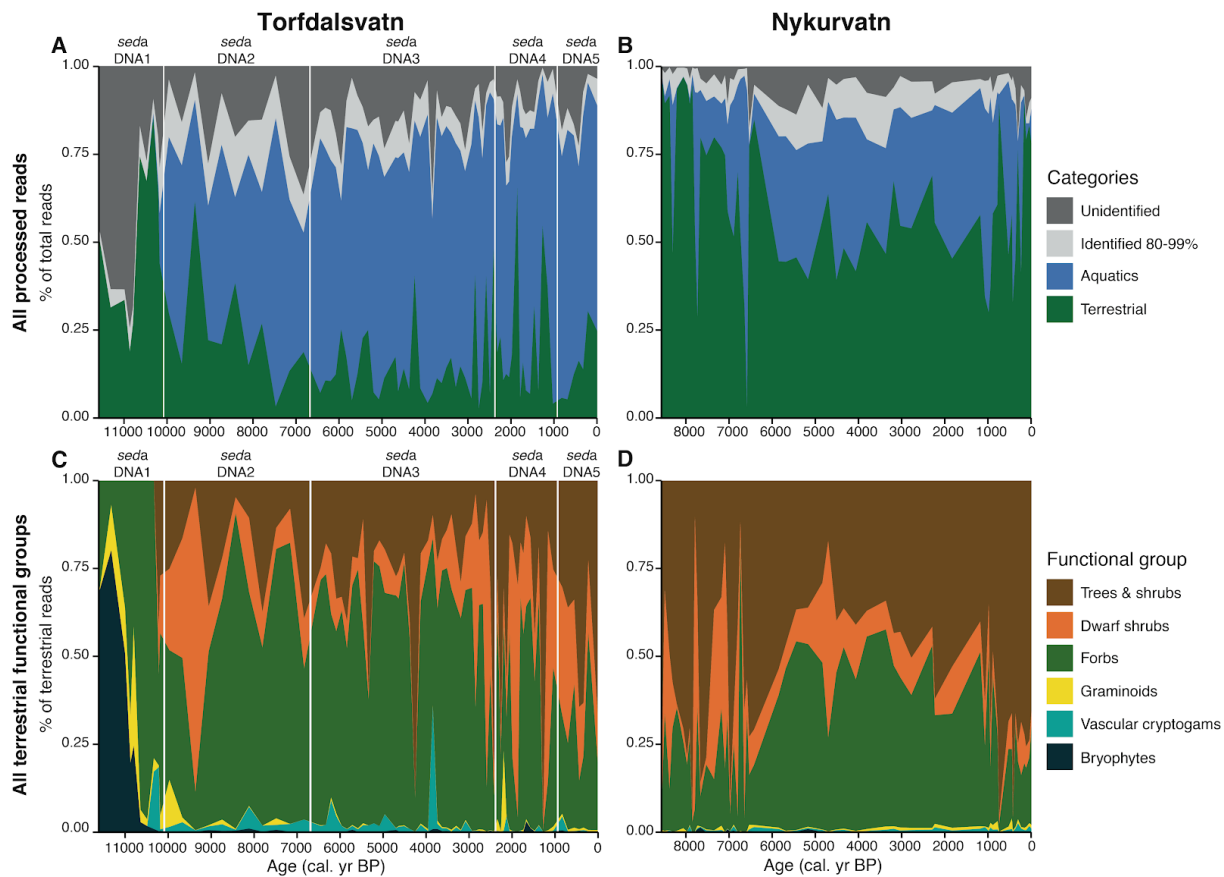

Fig. 6

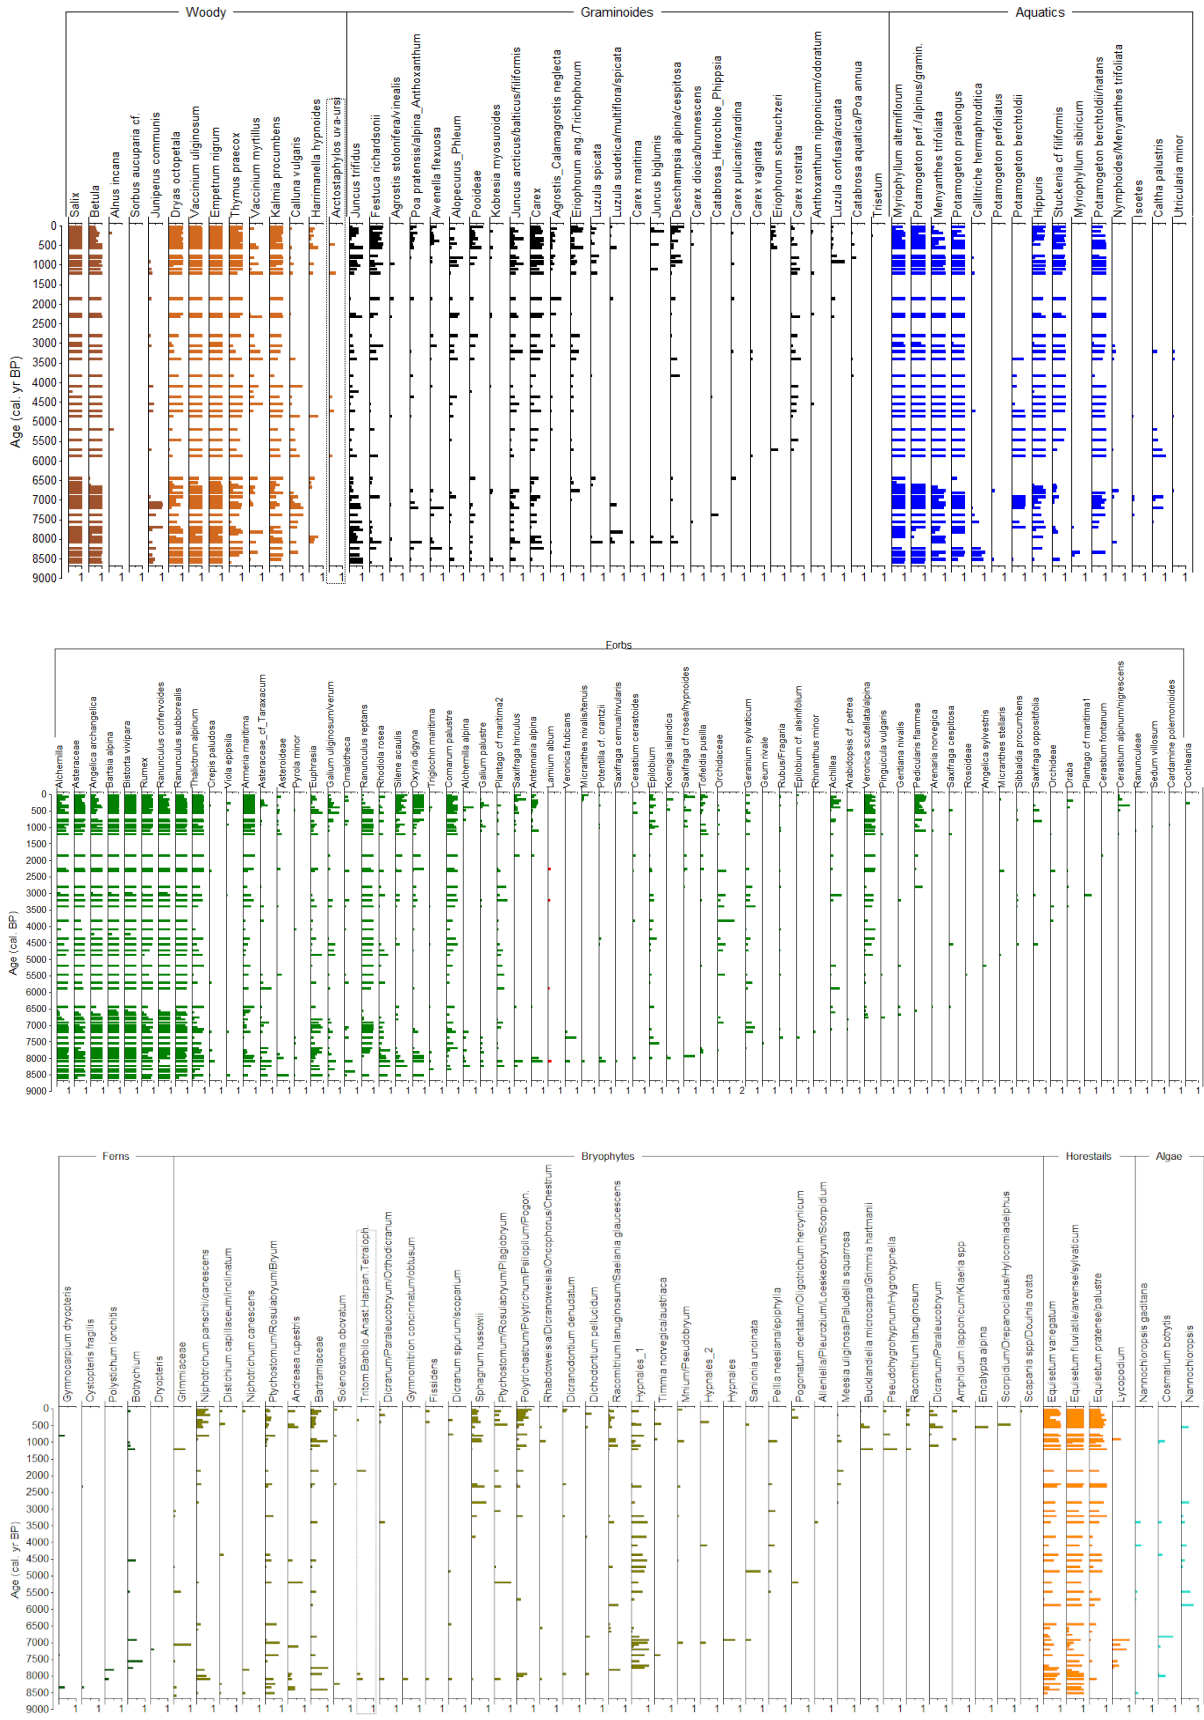

Fig. 7

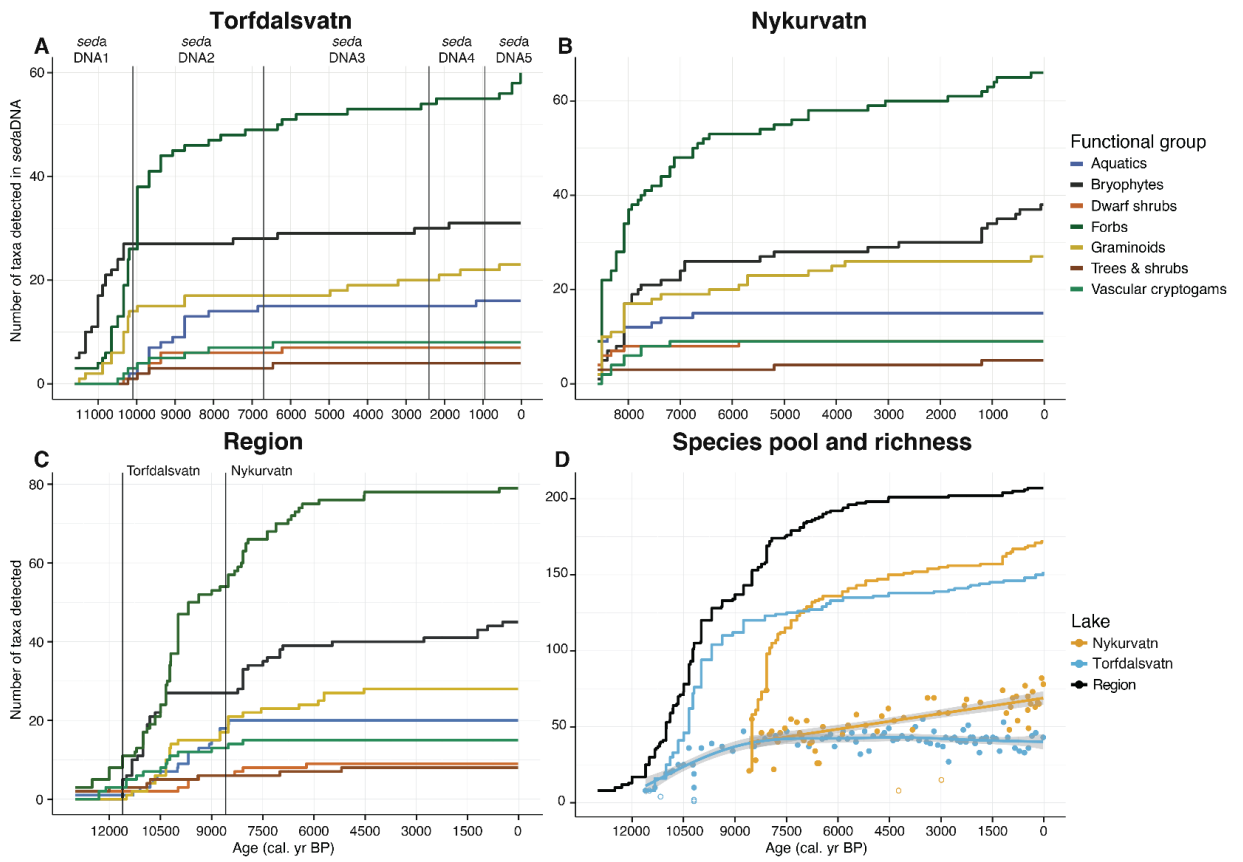

Fig. 8

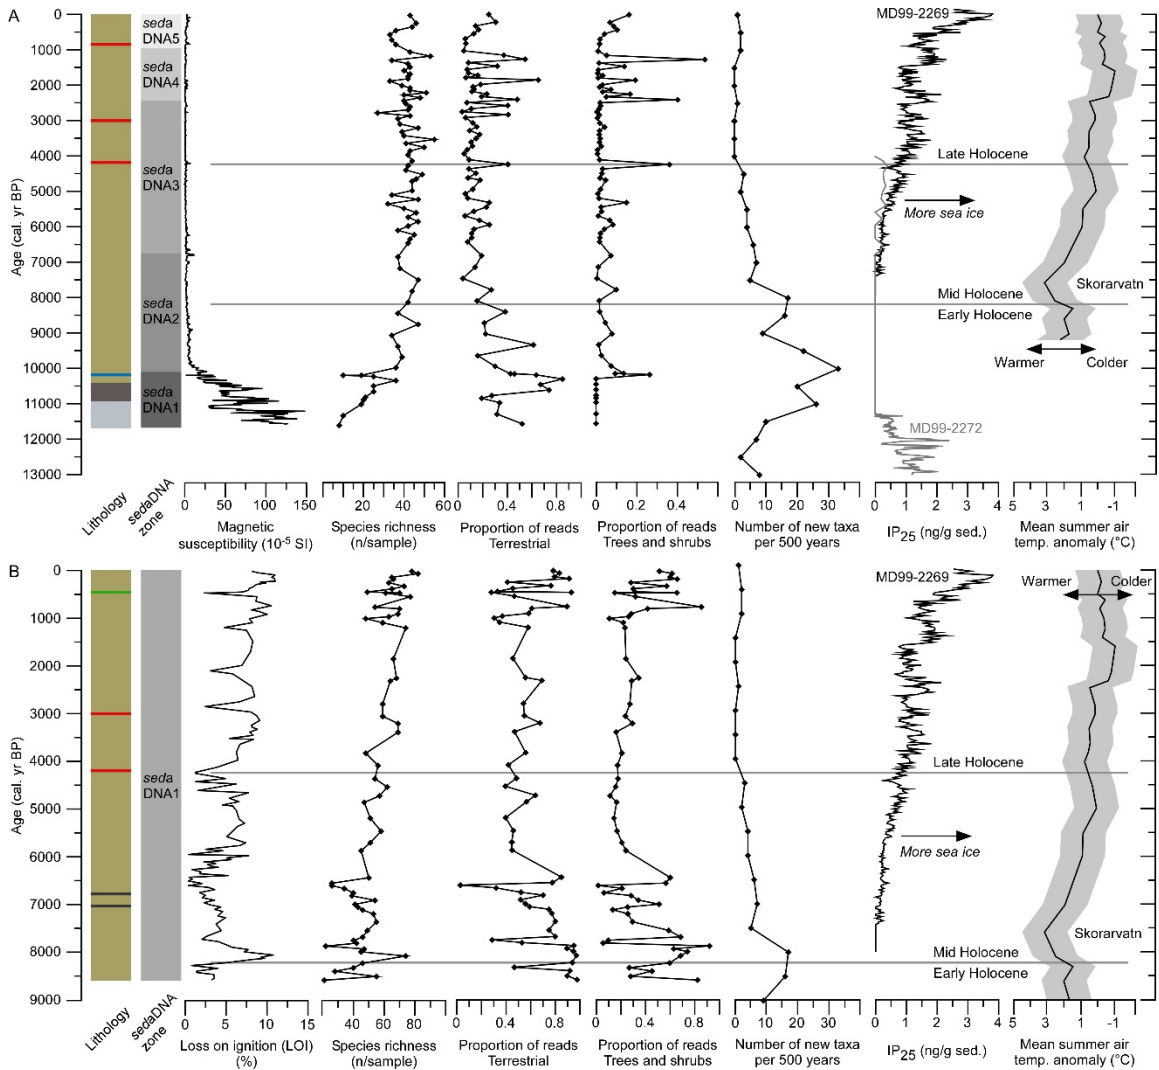

Fig. 9
